1 **Outcome of COVID-19 in hospitalised immunocompromised patients: an**  
2 **analysis of the WHO ISARIC CCP-UK prospective cohort study.**

3

4 Lance Turtle<sup>1,2\*</sup>, Mathew Thorpe<sup>3\*</sup>, Thomas M Drake<sup>3</sup>, Maaïke Swets<sup>4</sup>, Carlo  
5 Palmieri<sup>5</sup>, Clark D Russell<sup>6</sup>, Antonia Ho<sup>7</sup>, Stephen Aston<sup>2,8</sup>, Daniel G Wootton<sup>1,2</sup>,  
6 Alex Richter<sup>9,10</sup>, Thushan I de Silva<sup>11</sup>, Hayley E Hardwick<sup>1</sup>, Gary Leeming<sup>12</sup>, Andy  
7 Law<sup>13</sup>, Peter JM Openshaw<sup>14</sup>, Ewen M Harrison<sup>3</sup>, ISARIC4C investigators, J  
8 Kenneth Baillie<sup>13,15\*\*</sup>, Malcolm G Semple<sup>1,16\*\*</sup>, Annemarie B Docherty<sup>3,15\*\*</sup>

9

10 \* Equal contribution

11 \*\* Joint senior author

12

13 **Affiliations**

14 1 NIHR Health Protection Research Unit in Emerging and Zoonotic Infections,  
15 Department of Clinical Infection, Microbiology and Immunology, Institute of Infection,  
16 Veterinary and Ecological Sciences, University of Liverpool, Liverpool, UK

17 2 Liverpool University Hospitals NHS Foundation Trust, Liverpool, UK

18 3 Centre for Medical Informatics, Usher Institute, University of Edinburgh, UK

19 4 Department of Infectious Diseases, Leiden University Medical Centre, Leiden  
20 University, Leiden, the Netherlands

21 5 Department of Molecular and Clinical Cancer Medicine, Institute of Systems,  
22 Molecular and Integrative Biology, University of Liverpool, Liverpool, UK

23 6 University of Edinburgh Centre for Inflammation Research, Queen's Medical  
24 Research Institute, Edinburgh, UK

25 7 MRC-University of Glasgow Centre for Virus Research, University of Glasgow, 464  
26 Bearsden Road, Glasgow, UK

27 8 Institute of Infection, Veterinary and Ecological Sciences, University of Liverpool

28 9 Institute of Cancer and Genomic Science, College of Medical and Dental Science,  
29 University of Birmingham, UK

30 10 University Hospitals Birmingham NHS Foundation Trust, Birmingham, UK

31 11 Department of Infection, Immunity and Cardiovascular Disease, Medical School,  
32 The University of Sheffield, Sheffield, UK

33 12 Department of Biostatistics, University of Liverpool, Liverpool, UK.

34 13 The Roslin Institute, Easter Bush campus, University of Edinburgh, Edinburgh,  
35 UK

36 14 National Heart and Lung Institute, Imperial College London, London, UK

37 15 Intensive Care Unit, Royal Infirmary Edinburgh, Edinburgh, UK

38 16 Respiratory Medicine, Alder Hey Children's Hospital, Liverpool, UK

39

NOTE: This preprint reports new research that has not been certified by peer review and should not be used to guide clinical practice.

40 **§ Corresponding author:**

41 Lance Turtle, Ronald Ross Building, Department of Clinical Infection, Microbiology  
42 and Immunology, University of Liverpool, 8 West Derby Street, L69 7BE, Liverpool,  
43 UK.

44 [lance.turtle@liverpool.ac.uk](mailto:lance.turtle@liverpool.ac.uk)

45

46 **Running title:** Immunocompromise and COVID-19

47 **Keywords:** Immunocompromise; Immunosuppression; SARS-CoV-2; COVID-19

48

49 **Abstract word count:** 254 including titles (249 without)

50 **Main text word count:** 3,486 (30 references)

51

52 **Abstract**

53 Background

54 Immunocompromised patients may be at higher risk of mortality if hospitalised with  
55 COVID-19 compared with immunocompetent patients. However, previous studies  
56 have been contradictory. We aimed to determine whether immunocompromised  
57 patients were at greater risk of in-hospital death, and how this risk changed over the  
58 pandemic.

59 Methods

60 We included patients  $\geq 19$  yrs with symptomatic community-acquired COVID-19  
61 recruited to the ISARIC WHO Clinical Characterisation Protocol UK. We defined  
62 immunocompromise as: immunosuppressant medication preadmission, cancer  
63 treatment, organ transplant, HIV, or congenital immunodeficiency. We used logistic  
64 regression to compare the risk of death in both groups, adjusting for age, sex,  
65 deprivation, ethnicity, vaccination and co-morbidities. We used Bayesian logistic  
66 regression to explore mortality over time.

67 Findings

68 Between 17/01/2020 and 28/02/2022 we recruited 156,552 eligible patients, of whom  
69 21,954 (14%) were immunocompromised. 29% (n=6,499) of immunocompromised  
70 and 21% (n=28,608) of immunocompetent patients died in hospital. The odds of in-  
71 hospital mortality were elevated for immunocompromised patients (adjOR 1.44, 95%  
72 CI 1.39-1.50,  $p < 0.001$ ). As the pandemic progressed, in-hospital mortality reduced  
73 more slowly for immunocompromised patients than for immunocompetent patients.  
74 This was particularly evident with increasing age: the probability of the reduction in  
75 hospital mortality being less for immunocompromised patients aged 50-69yrs was  
76 88% for men and 83% for women, and for those  $> 80$  yrs was 99% for men, and 98%  
77 for women.

78 Conclusions

79 Immunocompromised patients remain at elevated risk of death from COVID-19.  
80 Targeted measures such as additional vaccine doses and monoclonal antibodies  
81 should be considered for this group.

82 Funding

83 National Institute for Health Research; Medical Research Council; Chief Scientist  
84 Office, Scotland.

85

86

87

88

89

## 90 Introduction

91 Coronavirus disease 2019 (COVID-19), the disease caused by severe acute  
92 respiratory syndrome coronavirus 2 (SARS-CoV-2), disproportionately affects older  
93 people and those with underlying health conditions (1). However, a key challenge  
94 throughout the pandemic has been to delineate which comorbidities confer the  
95 greatest risk. Severe COVID-19 is an inflammatory process (2, 3), with several lines  
96 of evidence suggesting that immune dysfunction is linked to adverse outcome (4, 5).  
97 Consistent with this are clinical trial findings that anti-inflammatory treatments with  
98 dexamethasone, tocilizumab and baricitinib improve survival in patients with  
99 respiratory failure (6-8).

100 Early data in the pandemic suggested a high mortality among immunocompromised  
101 patients, with organ transplant recipients being at particular risk (9, 10). Studies have  
102 compared mortality among immunocompromised patients with other patient groups  
103 with COVID-19 with conflicting results. Some studies show increased mortality (11,  
104 12), whereas others show no difference from other patient groups (13, 14). A  
105 challenge when attributing risk to individual comorbidities has been that many factors  
106 are correlated. For example, some kidney transplant recipients also have abnormal  
107 renal function which is itself a risk factor for poor outcome from COVID-19 (1, 15). A  
108 large UK population study using routine health data from 17 million primary care  
109 health records (OPENSafely) found that immunocompromising conditions, including  
110 organ transplant and haematological malignancy, increased the risk of COVID-19  
111 associated death (16). However, detailed information on disease severity at  
112 presentation and events during hospitalisation were not available.

113 As public health measures to control the spread of SARS-CoV-2 have now eased,  
114 concern remains for the safety of those who are immunocompromised and whose  
115 vaccination response may be compromised (17). Our aim was therefore to analyse  
116 one of the largest prospective cohorts of hospitalised COVID-19 cases, the ISARIC  
117 WHO CCP-UK study dataset, to determine whether outcomes are worse in  
118 immunocompromised patients, and whether the improved survival observed in  
119 general over the course of the pandemic differed between immunocompromised and  
120 immunocompetent patients.

121

122

## 123 **Methods**

124

### 125 *Study design and setting:*

126 The ISARIC WHO Clinical Characterisation Protocol in the United Kingdom (CCP-  
127 UK) was activated on 17th January 2020 as part of the public health response to the  
128 COVID-19 pandemic. CCP-UK prospectively recruited a cohort of >300,000 patients,  
129 hospitalised with COVID-19, from 306 healthcare facilities across the UK. The  
130 sample size was not pre-specified. The protocol, revision history, case report forms  
131 and consent forms, are available online at [isaric4c.net](http://isaric4c.net). The study received ethical  
132 approval from the South Central - Oxford C Research Ethics Committee in England  
133 (Ref: 13/SC/0149) and by the Scotland A Research Ethics Committee (Ref:  
134 20/SS/0028). This study is reported according to the Strengthening the Reporting of  
135 Observational Studies in Epidemiology (STROBE) guidelines for cohort studies.

136

### 137 *Participants:*

138 Adults ( $\geq 19$  yrs) who were admitted to hospital between 17th January 2020 and 28<sup>th</sup>  
139 February 2022 with confirmed or highly suspected SARS-CoV-2 infection leading to  
140 COVID-19 were included in this analysis: during the first wave, highly suspected  
141 cases were also eligible for inclusion, because SARS-CoV-2 was an emergent  
142 pathogen at that time and laboratory confirmation was dependent on availability of  
143 testing. SARS-CoV-2 infection was confirmed using reverse-transcriptase  
144 polymerase chain reaction (RT-PCR).

### 145 *Data sources:*

146 Data collected by research staff were entered into a standardised electronic case  
147 report form within a secure Research Electronic Data Capture (REDCap) database.  
148 Vaccination data were obtained from the national immunisation management system  
149 (NIMS), and deterministically linked to the ISARIC CCP-UK REDCap data using  
150 NHS number, which was collected as part of the ISARIC CCP-UK dataset.  
151 Vaccination data were not available for Scottish patients and these analyses are  
152 therefore restricted to only English and Welsh ISARIC CCP-UK participants with a  
153 valid, linkable NHS number. Participants with invalid NHS numbers were excluded  
154 from the analysis after December 2020 to allow accurate linkage with vaccination  
155 data. Readmissions and those with erroneously recorded admission dates (eg, those  
156 with admission dates outside the scope of the study) were also removed prior to  
157 analysis.

158

### 159 *Variables:*

160 Immunocompromise: We considered patients to be immunocompromised if they met  
161 any of the following clinical criteria: solid organ transplant, active cancer diagnosis  
162 and treatment, congenital immune deficiency, human immunodeficiency (HIV)  
163 infection, in receipt of pre-admission immune-suppressive treatments, or pre-  
164 admission oral or intravenous steroids (see online supplement). For the purposes of  
165 analysis, these patients were only considered to be in one category, with the  
166 underlying reason for being immunocompromised being categorised by the following  
167 hierarchy: inherited immunological or metabolic disorder > solid organ transplant >

168 cancer > HIV > pre-admission immunosuppressants > pre-admission steroids.  
169 Overlap between immunocompromising factors were visualised as part of the  
170 analysis.

171

172 Participant characteristics: patient demographics including age, sex, comorbidities,  
173 and ethnicity were recorded at hospital admission (see online supplement).  
174 Deprivation index was calculated using hospital level geographical data provided by  
175 the Office of National Statistics (ONS). Physiological parameters of the 4C Mortality  
176 Score (18) were used as markers of illness severity at presentation: respiratory rate  
177 (breaths per min), Glasgow Coma Scale, oxygen saturation (%), blood urea  
178 (mmol/L), blood C-reactive protein (CRP, mg/L). Symptoms recorded on admission  
179 are listed in the online supplement. If no symptom criteria were met, a patient was  
180 considered asymptomatic and was excluded from the analysis. If a patient met at  
181 least one of the criteria, they were considered to be symptomatic and were included.

182

183 In-hospital interventions were recorded including: critical care admission, level of  
184 respiratory support and treatments for COVID-19 including corticosteroids and  
185 interleukin-6 receptor blockers. For steroid and anti-IL-6 treatments, analyses were  
186 restricted to patients on oxygen therapy. Treatment with IL-6 receptor blockers was  
187 indicated by national guidance for patients with a C-reactive protein (CRP) blood  
188 level of 75mg/l or greater, or on respiratory support. Due to the nature of the data  
189 collection, pre-admission steroids were assessed through a free text search of pre-  
190 admission medication; dexamethasone, beclometasone, prednisolone,  
191 cortisone/hydrocortisone or betamethasone were included.

192

193 Vaccination: to investigate the effect of vaccination, we considered patients having  
194 received no vaccine doses or within 20 days of the first vaccine dose as being  
195 unprotected and therefore having no immunity to SARS-CoV-2; we then stratified  
196 patients as having received 1, 2, 3 and 4 or more doses, provided three weeks or  
197 more had elapsed between the first vaccination and symptom onset or positive RT-  
198 PCR test (whichever was earlier), or one week for subsequent doses, to allow  
199 immunity to develop (19).

200

201 Pandemic waves and SARS-CoV-2 variants: wave 1 was considered to be between  
202 17<sup>th</sup> January 2020, the date that the study protocol was activated in the UK, and 31<sup>st</sup>  
203 August 2020, the nadir of hospital inpatient numbers between the first and second  
204 waves. This wave was largely accounted for by the B.1 lineage SARS-CoV-2  
205 ancestral strain containing the D614G mutation. Wave 2 was defined as the period  
206 from 1<sup>st</sup> September 2020 to 31<sup>st</sup> March 2021, and comprised a mixture largely of B.1  
207 D614G lineages and the alpha variant (B.1.1.7). The third wave, during which the  
208 alpha variant was replaced by the delta variant (B.1.617.2), was between 1<sup>st</sup> April  
209 2021 and 12<sup>th</sup> December 2021. From 13<sup>th</sup> December 2021 onwards, omicron  
210 (B.1.1.529) became the dominant circulating variant in the UK and out-competed  
211 delta (20). We refer to this period as the fourth wave.

212



213 Outcomes: the primary outcome was in-hospital mortality. Secondary outcomes were  
214 the use of oxygen, non-invasive ventilation, invasive mechanical ventilation and  
215 admission to critical care.

216

217 *Missing data:*

218 Due to the nature of such a large-scale, observational study, conducted during  
219 pandemic surge conditions, high degrees of missingness exist in multiple variables,  
220 particularly in the most recent wave dominated by the Omicron variant where  
221 recruitment has waned over time. As this study is predominantly descriptive, we  
222 have not performed any imputation to correct any data missingness, and instead are  
223 providing descriptions of the data as it is known.

224

225 *Statistical analyses:*

226 Continuous data are summarised as median (interquartile range) and categorical  
227 data as frequency (percentage). We employed statistical disclosure control (SDC)  
228 measures to protect patient confidentiality and anonymity.

229

230 To examine in-hospital mortality, we initially performed multivariable logistic  
231 regression adjusted for age, sex, number of comorbidities, ethnicity, deprivation  
232 index and vaccination (1). These variables were selected for inclusion in models  
233 based on their important effects previously described by ourselves and others (1,  
234 21). Other outcome measures were the use of oxygen, non-invasive ventilation,  
235 intensive care admission and invasive ventilation, and were adjusted for the same  
236 variables. We subsequently explored whether changes in in-hospital mortality over  
237 time were different between immunocompetent and immunocompromised patients. A  
238 Bayesian logistic regression model was specified with weakly informative priors on  
239 model coefficients (four chains, 500 warmup, 2,000 iterations). The probability of  
240 death was determined for immunocompromised and immunocompetent patients in  
241 the first wave and the fourth wave, accounting for age, sex, socioeconomic  
242 deprivation, and comorbidity count. We then calculated the absolute risk difference  
243 for mortality in immunocompromised and immunocompetent patients in the first wave  
244 and compared this with the absolute risk difference in the omicron wave. We set  
245 comorbidity count to "2+", and deprivation score to "2", the most common level for  
246 each variable, and stratified these results by sex, age category, and vaccination  
247 status. All analysis was performed using the statistical software package R version  
248 4.1.1 including the use of the associated packages tidyverse, finalfit and brms.

249

## 250 Results

251

252 Between 17<sup>th</sup> January 2020 and 28<sup>th</sup> February 2022, data for 304,628 admissions of  
253 all ages were collected. Outcome data were available for 156,552 unique adult index  
254 admissions with symptomatic COVID-19 and valid NHS numbers (Figure S1).  
255 134,598 (86%) patients were classified as immunocompetent, and 21,954 (14%)  
256 were immunocompromised (Figure S1). There was overlap between the  
257 immunocompromising conditions (Figure 1A), for example a large proportion of  
258 patients with previous solid organ transplant were also taking immunosuppressive  
259 medication. Using the hierarchical categorisation defined above, most patients that  
260 were identified as immunocompromised were either those taking  
261 immunosuppressive medication with no other documented immunocompromise  
262 (n=12,701 of 21,954, 58%), or those who had received recent cancer treatment  
263 (n=5,116, 23%). The numbers of patients with other conditions were: congenital  
264 immune deficiency (n=526, 2%), previous solid organ transplant (1,559, 7%),  
265 HIV/AIDS (498, 2%) and pre-admission steroids (n=1,554, 7%).

266

267 The median age of the immunocompetent patients was 69.5 years (IQR 53.4 to  
268 82.0), and was slightly younger than that of the immunocompromised group which  
269 was 71.5 (IQR 58.7 to 80.3) (Table 1). Ages of immunocompromised patients varied  
270 depending on the aetiology of their immunocompromise. Those with cancer (median  
271 age 72.0. IQR (62.0 to 79.7)) and those on pre-admission immunosuppressants  
272 (median 72.5, IQR (59.1 to 81.2)) or corticosteroids (75.1 (63.0 to 83.6)) were  
273 considerably older than those with congenital immune deficiency (median 61.8, IQR  
274 (45.3 to 77.2)), solid organ transplant (median 62.4 (IQR 52.1 to 72.0)) and HIV (57.8  
275 (IQR 49.8 to 70.5)). 95% (n=20,801 of 21,954) of patients with immunocompromise  
276 had at least one additional comorbidity (in addition to the reason for  
277 immunocompromise). Chronic pulmonary disease (n=6,190 of 21,954, (28%),  
278 immunocompromised) vs (n=18,495 of 134,598, (14%), immunocompetent),  
279 haematologic disease (n=2,041 (9%)) vs (n=3,665 (2%)), rheumatologic disease  
280 (n=4,540 (21%)) vs (n=12,901 (10%)), kidney disease (n=4,266 (19%)) vs (n=18,901  
281 (14%)), and malignant neoplasm (n=5,113 (23%)) vs (n=8,484 (6%)) were more  
282 common in immunocompromised vs immunocompetent patients. Diabetes (n=6,042  
283 (28%) immunocompromised) vs (n=36,322 (27%) immunocompetent), obesity  
284 (n=2,945 (13%)) vs (n=17,462 (13%)), hypertension (n=9,758 (44%)) vs (n=57,117  
285 (42%)), chronic cardiac disease (n=6,607 (30%)) vs (n=35,597 (26%)) were similar in  
286 both groups (Table 1).

287

288 Overall, 85% (n=114,364 of 134,598) of immunocompetent and 81% (n=17,737 of  
289 21,954) of immunocompromised patients hospitalised with COVID-19 were  
290 unvaccinated – 49% (n=76,948 of 156,552) were admitted before vaccines were  
291 available in waves 1 and 2 (Table 1, Figure S1). 5,112 (4%) of immunocompetent  
292 and 789 (4%) of immunocompromised patients admitted had received one dose of  
293 vaccine > 20 days earlier at the time of hospital admission. 11,601 (9%)  
294 immunocompetent and 2804 (13%) immunocompromised patients had received two  
295 doses > 7 days earlier. 592 (<1%) immunocompetent and 290 (1%) of  
296 immunocompromised patients had received 3 doses >7 days before the date of



297 hospital admission (Table 1). Over time, the relative proportion of  
298 immunocompromised patients who were unvaccinated was less than for  
299 immunocompetent patients (Figure S2).

300

### 301 Presenting symptoms and severity of illness:

302 Illness severity at presentation to hospital as measured by the physiological  
303 components of the 4C Mortality Score was similar in the two groups at the beginning  
304 of the pandemic, suggesting no difference in the threshold for admission for  
305 immunocompromised patients (Figure 1B). Illness severity reduced in both groups  
306 over the course of the pandemic, although to a lesser extent in the  
307 immunocompromised group (Figure 1B and C). When compared with  
308 immunocompetent patients, in the omicron wave immunocompromised patients had  
309 higher respiratory rates ( $\geq 30$  bpm 67% vs immunocompetent 57%), lower SaO<sub>2</sub>  
310 (<92% 22% vs 15%), higher urea (urea  $\geq 7$  mmol/l 49% vs 39%) and a higher  
311 inflammatory response (CRP  $\geq 50$  mg/l 57% vs 47%) (Table S2, Figure 1C).

312

### 313 Treatments received:

314 When restricted to patients receiving oxygen, more patients in the  
315 immunocompromised group received corticosteroids than the immunocompetent  
316 group (Table S3, Figure S3). For patients on oxygen with a CRP > 75, more  
317 immunocompetent patients received tocilizumab compared with  
318 immunocompromised patients (Table S3, Figure S4).

319

### 320 Outcomes:

321 Similar proportions of immunocompromised and immunocompetent patients received  
322 oxygen therapy and were admitted to critical care. Immunocompromised patients  
323 were more likely to receive non-invasive ventilation, and/or invasive mechanical  
324 ventilation (Table 2). 6,499 (29%) immunocompromised patients died, compared  
325 with 28,608 (21%) immunocompetent patients. The highest mortality rates were seen  
326 in patients with active cancer (n=1,818 (37%)) and those on pre-admission steroids  
327 (n=517 (34%)) (Table S4).

328

329 After adjustment for age, sex, ethnicity, deprivation and comorbidities, the odds ratio  
330 (OR) for death in the immunocompromised group was 1.44 (95% CI 1.39-1.5,  $p <$   
331 0.001) (Figure 2A). The ORs of several other outcomes were significantly different  
332 for immunocompromised relative to immunocompetent patients, though with much  
333 smaller effect sizes. The OR for receiving oxygen was 1.10 (95% CI 1.06, 1.15,  
334  $p < 0.001$ ), for critical care admission was 1.08 (95% CI 1.03, 1.13,  $p = 0.001$ ), receiving  
335 non-invasive ventilation 1.17 (95% CI 1.12, 1.22,  $p < 0.001$ ), and invasive ventilation  
336 1.10 (95% CI 1.03, 1.18,  $p = 0.005$ ) (Figure 2A).

337

### 338 Changes in mortality over time:

339 Mortality for both immunocompetent and immunocompromised groups reduced over  
340 time. Crude in-hospital mortality of immunocompetent patients in the first wave was

341 30%, compared with 36% in immunocompromised patients. In the fourth (omicron)  
342 wave, the mortality was 11% for immunocompetent patients, and 19% for  
343 immunocompromised patients (Table 2).

344

345 After adjustment for age, sex, comorbidity count, deprivation and vaccination status,  
346 compared with immunocompetent patients in wave 1, the OR for mortality remained  
347 elevated in all waves in immunocompromised patients (Figure 2B). Univariable  
348 analysis showed the same trend (Figure S5). In the fourth wave, nearly a year after  
349 the vaccination program was initiated, the OR for death compared with the first wave  
350 was 0.38 (95%CI 0.34, 0.42,  $p < 0.001$ ) for immunocompetent patients and 0.63  
351 (95%CI 0.51, 0.76,  $p < 0.001$ ) for immunocompromised patients (Figure 2B). There  
352 was a decline in the number of patients enrolled in the study over time (Figure S6).

353

354 To investigate this further, we calculated the difference in risk of death between the  
355 first and fourth waves for both immunocompetent and immunocompromised patients.  
356 using the Bayesian framework described in the methods, the probability that this  
357 difference was less for immunocompromised patients (indicating less improvement  
358 over the course of the pandemic) was always greater than 67% (Figure 3). Across all  
359 ages, and both sexes, in-hospital mortality for immunocompromised patients  
360 improved less than for immunocompetent patients. This was particularly evident with  
361 increasing age: the probability of the reduction in hospital mortality being less for  
362 immunocompromised patients aged 50-69yrs was 88% for men and 83% for women,  
363 and for those >80yrs was 99% for men, and 98% for women.

364

## 365 Discussion

366

367 Using the ISARIC CCP-UK cohort, we found that immunocompromised people  
368 admitted to hospital with COVID-19 had greater adjusted mortality than the general  
369 in-patient population. Mortality in this group has also not fallen to the same extent as  
370 the immunocompetent patients. Over the course of the pandemic,  
371 immunocompromised patients have seen less reduction in severity at presentation to  
372 hospital and less improvement in in-hospital mortality than immunocompetent  
373 patients.

374

375 Large population studies early in the pandemic have suggested that patients who are  
376 immunocompromised are more likely to die from COVID-19 than those who are  
377 immunocompetent (16). However, several studies, including one of the largest to  
378 date (22), have not shown an increased risk of in-hospital mortality in  
379 immunocompromised patients when compared to those with no known  
380 immunodeficiency. One possible explanation for this is that immunocompromised  
381 patients are more likely to be admitted to hospital, but once hospitalised, the  
382 outcomes are similar. Our data challenge this hypothesis. Once admitted, the odds  
383 of in-hospital mortality (adjusted for age, sex, ethnicity, vaccination and co-  
384 morbidities) were higher for the immunocompromised group, with less improvement  
385 in outcome over the course of the pandemic compared with the immunocompetent  
386 group. Disease severity (physiological derangement) at presentation was similar for  
387 the two groups early in the pandemic. Whilst severity at presentation has decreased  
388 for both groups over time, as the pandemic progressed, the improvement seen was  
389 greater for immunocompetent patients. Immunocompromised patients are now on  
390 average more ill relative to immunocompetent patients. Other possibilities for  
391 differences between studies potentially include selection of patient groups to include,  
392 criteria for hospital admission and socio-ethnodemographic variation.

393

394 Immunocompromised patients with COVID-19 received steroids more frequently  
395 during their admission than immunocompetent patients. This might indicate a  
396 continuation of pre-admission, non-covid related steroid treatment. The less frequent  
397 use of tocilizumab, on the other hand (in patients who met the criteria for use), may  
398 indicate concern about the net state of immune suppression and careful weighing of  
399 risk benefit in the minds of treating clinicians. To better inform the use of anti-  
400 inflammatory treatments in this group, future studies targeted at  
401 immunocompromised patients, or with recruitment stratified by immune status, would  
402 be needed.

403

404 There was a reduction over time in the proportion of patients admitted after  
405 vaccination compared with those unvaccinated. However, the risk difference  
406 between immunocompromised and immunocompetent patients widened between the  
407 first wave, and the fourth wave, by which time vaccination levels in the population  
408 were high. In combination with our earlier work (23), this indicates that this group of  
409 patients may remain more vulnerable than the general population even after  
410 vaccination. Selection of SARS-CoV-2 variants is largely a function of transmissibility  
411 (24, 25), or immune escape (26), and a future variant could still have higher intrinsic

412 virulence than omicron. In this case, immunocompromised patients might be more  
413 vulnerable despite vaccination.

414

415 Our findings differ to those of Andersen *et al.* (22), which did not find an increase in  
416 mortality in immunocompromised patients from 42 US health systems. A difference  
417 in age may explain this discrepancy. The mean age of patients reported by Andersen  
418 *et al.* (59 years) was younger than our median age (71.5 years), suggesting that the  
419 difference between the two studies could be that here we are describing an older,  
420 more co-morbid population. In our study chronic pulmonary, haematologic,  
421 rheumatologic, kidney and liver disease were all more common in  
422 immunocompromised patients, which may reflect either the reasons for  
423 immunosuppression, or complications thereof. However, comorbidities such as heart  
424 disease and hypertension were not more common in the immunocompromised  
425 patients, indicating that differences in comorbidity were not the only reason for the  
426 difference in outcomes between the groups.

427

428 The ISARIC CCP-UK cohort is one of the largest datasets of hospitalised patients  
429 with COVID-19 in the world and has enabled us to study small subgroups such as  
430 those with congenital immune deficiencies, which have not been captured in smaller  
431 cohorts. The ISARIC CCP-UK dataset has detailed information regarding severity of  
432 illness at presentation which allowed us to explore whether the threshold for hospital  
433 admission differed between patient groups. We were also able to follow patient  
434 journeys through the hospital looking at in-hospital interventions and respiratory  
435 support which are lacking from routine healthcare datasets. There are some  
436 weaknesses to this study. We did not collect data on the detailed drug histories of  
437 patients prior to admission, and so we did not have information on which drug was  
438 responsible for immunocompromise. We lacked data on pre-admission steroid  
439 doses, meaning that we were unable to assess the extent to which steroid use  
440 contributed to immune compromise. Missing data in the medical and drug histories  
441 means that we may have underestimated the overall effect size by categorising  
442 some immunocompromised patients as immunocompetent.

443

444 We have observed that in hospital mortality for patients who are clinically extremely  
445 vulnerable with immunocompromise has fallen less than for than immunocompetent  
446 patients in the ISARIC CCP-UK dataset. Despite the benefits of vaccination, this  
447 group still lags behind the general patient population in the improvements in  
448 outcomes after hospitalisation. A number of interventions, such as remdesivir,  
449 molnupiravir and nirmatrelvir/ritonavir are now available to reduce the risk of  
450 progression to severe COVID-19 and hospitalisation in this patient group (27, 28).  
451 However, some immunocompromised patients do not respond well to COVID-19  
452 vaccines (29). and several monoclonal antibody treatments have now ceased to be  
453 effective due to antigenic variation of the omicron variant (30). However,  
454 tixagevimab/cilgavimab retains activity against omicron sub-variants BA.2, BA.4 and  
455 BA.5, but is not available for routine clinical care in the UK. The use of  
456 tixagevimab/cilgavimab remains a policy option and may close the gap between  
457 immunocompromised patients and the general population.

458

459  
460  
461  
462  
463  
464  
465  
466  
467  
468  
469  
470  
471  
472  
473  
474  
475  
476  
477  
478  
479  
480  
481  
482  
483  
484  
485  
486  
487  
488  
489  
490  
491  
492  
493  
494  
495  
496  
497  
498  
499  
500  
501  
502  
503  
504  
505  
506  
507  
508

## Acknowledgements

This work is supported by grants from: the National Institute for Health Research (NIHR) [award CO-CIN-01], the Medical Research Council [grant MC\_PC\_19059 and MR/V028979/1], the Chief Scientist Office, Scotland, and by the NIHR Health Protection Research Unit (HPRU) in Emerging and Zoonotic Infections at University of Liverpool in partnership with the UK Health Security Agency (UK-HSA), in collaboration with Liverpool School of Tropical Medicine and the University of Oxford [award 200907], NIHR HPRU in Respiratory Infections at Imperial College London with UK-HSA [award 200927], Wellcome Trust and Department for International Development [215091/Z/18/Z], the Bill and Melinda Gates Foundation [OPP1209135], Liverpool Experimental Cancer Medicine Centre (Grant Reference: C18616/A25153), NIHR Biomedical Research Centre at Imperial College London [IS-BRC-1215-20013], EU Platform for European Preparedness Against (Re-) emerging Epidemics (PREPARE) [FP7 project 602525]. We acknowledge the NIHR Clinical Research Network for providing infrastructure support for this research. This research is part of the Data and Connectivity National Core Study, led by Health Data Research UK in partnership with the Office for National Statistics and funded by UK Research and Innovation (grant ref MC\_PC\_20029). LT is supported by a Wellcome Trust clinical career development fellowship a [205228/Z/16/Z]. PJMO is supported by a NIHR Senior Investigator Award [award 201385]. DGW is supported by an NIHR Advanced Fellowship [NIHR300669]. For the purpose of Open Access, the authors have applied a CC-BY public copyright licence to any Author Accepted Manuscript version arising from this submission. The views expressed are those of the authors and not necessarily those of the DHSC, DID, NIHR, MRC, Wellcome Trust or UK-HSA.

## Data availability

This work uses data provided by patients and collected by the NHS as part of their care and support #DataSavesLives. The CO-CIN data was collated by ISARIC4C Investigators. ISARIC4C welcomes applications for data and material access through our Independent Data and Material Access Committee (<https://isaric4c.net>).

## ISARIC4C investigators:

*\*Co-Lead Investigator (Consortium Lead):* J Kenneth Baillie.

*\*Co-Lead Investigator (Sponsor & Protocol CI):* Malcolm G Semple.

*\*Co-Lead Investigator (Imperial College):* Peter JM Openshaw.

*Co-Investigator:* Beatrice Alex, Petros Andrikopoulos, Benjamin Bach, Wendy S Barclay, Debby Bogaert, Meera Chand, Kanta Chechi, Graham S Cooke, Ana da Silva Filipe, Thushan de Silva, Annemarie B Docherty, Gonçalo dos Santos Correia, Marc-Emmanuel Dumas, Jake Dunning, Tom Fletcher, Christopher A Green, William Greenhalf, Julian L Griffin, Rishi K Gupta, Ewen M Harrison, Julian A Hiscox, Antonia Ying Wai Ho, Karl Holden, Peter W Horby, Samreen Ijaz, Saye Khoo, Paul Klenerman, Andrew Law, Matthew R Lewis, Sonia Liggi, Wei Shen Lim, Lynn Maslen, Alexander J Mentzer, Laura Merson, Alison M Meynert, Shona C Moore, Mahdad Noursadeghi, Michael Olanipekun, Anthonia Osagie, Massimo Palmarini, Carlo Palmieri, William A Paxton, Georgios Pollakis, Nicholas Price, Andrew



509 Rambaut, David L Robertson, Clark D Russell, Vanessa Sancho-Shimizu, Caroline J  
510 Sands, Janet T Scott, Louise Sigfrid, Tom Solomon, Shiranee Sriskandan, David  
511 Stuart, Charlotte Summers, Olivia V Swann, Zoltan Takats, Panteleimon Takis,  
512 Richard S Tedder, AA Roger Thompson, Emma C Thomson, Ryan S Thwaites,  
513 Lance CW Turtle, Maria Zambon.  
514 *Data Analyst:* Thomas M Drake, Cameron J Fairfield, Stephen R Knight, Kenneth A  
515 Mclean, Derek Murphy, Lisa Norman , Riinu Pius, Catherine A Shaw.  
516 *Data and Information System Manager:* Marie Connor, Jo Dalton, Carrol Gamble,  
517 Michelle Girvan, Sophie Halpin, Janet Harrison, Clare Jackson, James Lee, Laura  
518 Marsh, Daniel Plotkin, Stephanie Roberts, Egle Saviciute.  
519 *Data Integration and Presentation:* Sara Clohisey, Ross Hendry, Susan Knight, Eva  
520 Lahnsteiner, Andrew Law, Gary Leeming, Lucy Norris, James Scott-Brown, Sarah  
521 Tait, Murray Wham.  
522 *ISARIC Clinical Coordinator:* Gail Carson.  
523 *Edinburgh Laboratory Staff and Volunteers:* Richard Clark, Audrey Coutts, Lorna  
524 Donnelly, Angie Fawkes, Tammy Gilchrist, Katarzyna Hafezi, Louise MacGillivray,  
525 Alan Maclean, Sarah McCafferty, Kirstie Morrice, Lee Murphy, Nicola Wrobel.  
526 *Local Principal Investigators:* Kayode Adeniji, Daniel Agranoff, Ken Agwuh, Dhiraj  
527 Ail, Erin L. Aldera, Ana Alegria, Sam Allen, Brian Angus, Abdul Ashish, Dougal  
528 Atkinson, Shahedal Bari, Gavin Barlow, Stella Barnass, Nicholas Barrett, Christopher  
529 Bassford, Sneha Basude, David Baxter, Michael Beadsworth, Jolanta Bernatoniene,  
530 John Berridge, Colin Berry, Nicola Best, Pieter Bothma, Robin Brittain-Long, Naomi  
531 Bulteel, Tom Burden, Andrew Burtenshaw, Vikki Caruth, David Chadwick, David  
532 Chadwick, Duncan Chamblor, Nigel Chee, Jenny Child, Srikanth Chukkambotla,  
533 Tom Clark, Paul Collini, Catherine Cosgrove, Jason Cupitt, Maria-Teresa Cutino-  
534 Moguel, Paul Dark, Chris Dawson, Samir Dervisevic, Phil Donnison, Sam  
535 Douthwaite, Andrew Drummond, Ingrid DuRand, Ahilanadan Dushianthan, Tristan  
536 Dyer, Cariad Evans, Chi Eziefula, Chrisopher Fegan, Adam Finn, Duncan Fullerton,  
537 Sanjeev Garg, Sanjeev Garg, Atul Garg, Effrossyni Gkrania-Klotsas, Jo Godden,  
538 Arthur Goldsmith, Clive Graham, Tassos Grammatikopoulos, Elaine Hardy, Stuart  
539 Hartshorn, Daniel Harvey, Peter Havalda, Daniel B Hawcutt, Maria Hobrok, Luke  
540 Hodgson, Anil Hormis, Joanne Howard, Michael Jacobs, Susan Jain, Paul Jennings,  
541 Agilan Kaliappan, Vidya Kasipandian, Stephen Kegg, Michael Kelsey, Jason  
542 Kendall, Caroline Kerrison, Ian Kerlake, Oliver Koch, Gouri Koduri, George Koshy,  
543 Shondipon Laha, Steven Laird, Susan Larkin, Tamas Leiner, Patrick Lillie, James  
544 Limb, Vanessa Linnett, Jeff Little, Mark Lyttle, Michael MacMahon, Emily  
545 MacNaughton, Ravish Mankregod, Huw Masson, Elijah Matovu, Katherine  
546 McCullough, Ruth McEwen, Manjula Meda, Gary Mills, Jane Minton, Mariyam  
547 Mirfenderesky, Kavya Mohandas, Quen Mok, James Moon, Elinoor Moore, Patrick  
548 Morgan, Craig Morris, Katherine Mortimore, Samuel Moses, Mbiye Mpenge,  
549 Rohinton Mulla, Michael Murphy, Thapas Nagarajan, Megan Nagel, Mark Nelson,  
550 Lillian Norris, Matthew K. O'Shea, Marlies Ostermann, Igor Otahal, Mark Pais, Carlo  
551 Palmieri, Selva Panchatsharam, Danai Papakonstantinou, Padmasayee Papineni,  
552 Hassan Paraiso, Brij Patel, Natalie Pattison, Justin Pepperell, Mark Peters, Mandeep  
553 Phull, Stefania Pintus, Tim Planche, Frank Post, David Price, Rachel Prout, Nikolas  
554 Rae, Henrik Reschreiter, Tim Reynolds, Neil Richardson, Mark Roberts, Devender  
555 Roberts, Alistair Rose, Guy Rousseau, Bobby Ruge, Brendan Ryan, Taranprit  
556 Saluja, Sarah Cole, Matthias L Schmid, Aarti Shah, Manu Shankar-Hari, Prad  
557 Shanmuga, Anil Sharma, Anna Shawcross, Jagtur Singh Pooni, Jeremy Sizer,  
558 Richard Smith, Catherine Snelson, Nick Spittle, Nikki Staines, Tom Stambach,



559 Richard Stewart, Pradeep Subudhi, Tamas Szakmany, Kate Tatham, Jo Thomas,  
560 Chris Thompson, Robert Thompson, Ascanio Tridente, Darell Tupper-Carey, Mary  
561 Twagira, Nick Vallotton, Rama Vancheeswaran, Lisa Vincent-Smith, Shico  
562 Visuvanathan, Alan Vuylsteke, Sam Waddy, Rachel Wake, Andrew Walden,  
563 Ingeborg Welters, Tony Whitehouse, Paul Whittaker, Ashley Whittington, Meme  
564 Wijesinghe, Martin Williams, Lawrence Wilson, Stephen Winchester, Martin Wiselka,  
565 Adam Wolverson, Daniel G Wootton, Andrew Workman, Bryan Yates, Peter Young.  
566 *Material Management:* Sarah E McDonald, Victoria Shaw.  
567 *Outbreak Laboratory Staff and Volunteers:* Katie A. Ahmed, Jane A Armstrong,  
568 Milton Ashworth, Innocent G Asimwe, Siddharth Bakshi, Samantha L Barlow, Laura  
569 Booth, Benjamin Brennan, Katie Bullock, Nicola Carlucci , Emily Cass, Benjamin WA  
570 Catterall, Jordan J Clark, Emily A Clarke, Sarah Cole, Louise Cooper, Helen Cox,  
571 Christopher Davis, Oslem Dincarslan, Alejandra Doce Carracedo, Chris Dunn, Philip  
572 Dyer, Angela Elliott, Anthony Evans, Lorna Finch, Lewis WS Fisher, Lisa Flaherty,  
573 Terry Foster, Isabel Garcia-Dorival, Philip Gunning, Catherine Hartley, Anthony  
574 Holmes, Rebecca L Jensen, Christopher B Jones, Trevor R Jones, Shadia  
575 Khandaker, Katharine King, Robyn T. Kiy, Chrysa Koukorava, Annette Lake,  
576 Suzannah Lant, Diane Latawiec, Lara Lavelle-Langham, Daniella Lefteri, Lauren  
577 Lett, Lucia A Livoti, Maria Mancini, Hannah Massey, Nicole Maziere, Sarah  
578 McDonald, Laurence McEvoy, John McLauchlan, Soeren Metelmann, Nahida S  
579 Miah, Joanna Middleton, Joyce Mitchell, Shona C Moore, Ellen G Murphy, Rebekah  
580 Penrice-Randal, Jack Pilgrim, Tessa Prince, Will Reynolds, P. Matthew Ridley,  
581 Debby Sales, Victoria E Shaw, Rebecca K Shears, Benjamin Small, Krishanthi S  
582 Subramaniam, Agnieszka Szemiel, Aislynn Taggart, Jolanta Tanianis-Hughes, Jordan  
583 Thomas, Erwan Trochu, Libby van Tonder, Eve Wilcock, J. Eunice Zhang.  
584 *Patient Engagement:* Seán Keating.  
585 *Project Administrator:* Cara Donegan, Rebecca G. Spencer, Lauren Obosi.  
586 *Project Manager:* Chloe Donohue, Fiona Griffiths, Hayley Hardwick, Wilna  
587 Oosthuyzen.  
588  
589  
590  
591  
592  
593

## 594 **References**

595

- 596 1. Docherty AB, Harrison EM, Green CA, Hardwick HE, Pius R, Norman L, et al.  
597 Features of 20 133 UK patients in hospital with covid-19 using the ISARIC WHO  
598 Clinical Characterisation Protocol: prospective observational cohort study. *BMJ*.  
599 2020 May 22;369:m1985.32444460
- 600 2. Dorward DA, Russell CD, Um IH, Elshani M, Armstrong SD, Penrice-Randal  
601 R, et al. Tissue-Specific Immunopathology in Fatal COVID-19. *American Journal of*  
602 *Respiratory and Critical Care Medicine*. 2021;203(2):192-201
- 603 3. Thwaites RS, Sanchez Sevilla Uruchurtu A, Siggins MK, Liew F, Russell CD,  
604 Moore SC, et al. Inflammatory profiles across the spectrum of disease reveal a  
605 distinct role for GM-CSF in severe COVID-19. *Sci Immunol*. 2021 Mar  
606 10;6(57).33692097
- 607 4. Kuri-Cervantes L, Pampena MB, Meng W, Rosenfeld AM, Ittner CAG,  
608 Weisman AR, et al. Comprehensive mapping of immune perturbations associated  
609 with severe COVID-19. *Science Immunology*. 2020;5(49):eabd7114
- 610 5. Hoepel W, Chen HJ, Geyer CE, Allahverdiyeva S, Manz XD, de Taeye SW, et  
611 al. High titers and low fucosylation of early human anti-SARS-CoV-2 IgG promote  
612 inflammation by alveolar macrophages. *Sci Transl Med*. 2021 Jun  
613 2;13(596).33979301
- 614 6. Horby P, Lim WS, Emberson JR, Mafham M, Bell JL, Linsell L, et al.  
615 Dexamethasone in Hospitalized Patients with Covid-19. *N Engl J Med*. 2021 Feb  
616 25;384(8):693-704.32678530
- 617 7. Gordon AC, Mouncey PR, Al-Beidh F, Rowan KM, Nichol AD, Arabi YM, et al.  
618 Interleukin-6 Receptor Antagonists in Critically Ill Patients with Covid-19. *N Engl J*  
619 *Med*. 2021 Apr 22;384(16):1491-502.33631065
- 620 8. Horby PW, Emberson JR, Mafham M, Campbell M, Peto L, Pessoa-Amorim  
621 G, et al. Baricitinib in patients admitted to hospital with COVID-19 (RECOVERY): a  
622 randomised, controlled, open-label, platform trial and updated meta-analysis. 2022.
- 623 9. Pereira MR, Mohan S, Cohen DJ, Husain SA, Dube GK, Ratner LE, et al.  
624 COVID-19 in solid organ transplant recipients: Initial report from the US epicenter.  
625 *American Journal of Transplantation*. 2020;20(7):1800-8
- 626 10. Azzi Y, Parides M, Alani O, Loarte-Campos P, Bartash R, Forest S, et al.  
627 COVID-19 infection in kidney transplant recipients at the epicenter of pandemics.  
628 *Kidney International*. 2020;98(6):1559-67
- 629 11. Caillard S, Chavarot N, Francois H, Matignon M, Greze C, Kamar N, et al. Is  
630 COVID-19 infection more severe in kidney transplant recipients? *American Journal*  
631 *of Transplantation*. 2021;21(3):1295-303
- 632 12. Fisher AM, Schlauch D, Mulloy M, Dao A, Reyad AI, Correll M, et al.  
633 Outcomes of COVID-19 in hospitalized solid organ transplant recipients compared to  
634 a matched cohort of non-transplant patients at a national healthcare system in the  
635 United States. *Clinical Transplantation*. 2021;35(4)
- 636 13. Andersen KM, Mehta HB, Palamuttam N, Ford D, Garibaldi BT, Auwaerter  
637 PG, et al. Association Between Chronic Use of Immunosuppressive Drugs and  
638 Clinical Outcomes From Coronavirus Disease 2019 (COVID-19) Hospitalization: A  
639 Retrospective Cohort Study in a Large US Health System. *Clinical Infectious*  
640 *Diseases*. 2021;73(11):e4124-e30
- 641 14. Gatti M, Rinaldi M, Bussini L, Bonazzetti C, Pascale R, Pasquini Z, et al.  
642 Clinical outcome in solid organ transplant recipients affected by COVID-19 compared

- 643 to general population: a systematic review and meta-analysis. *Clin Microbiol Infect.*  
644 2022 Mar 12.35289294
- 645 15. Ozturk S, Turgutalp K, Arici M, Odabas AR, Altiparmak MR, Aydin Z, et al.  
646 Mortality analysis of COVID-19 infection in chronic kidney disease, haemodialysis  
647 and renal transplant patients compared with patients without kidney disease: a  
648 nationwide analysis from Turkey. *Nephrology Dialysis Transplantation.*  
649 2020;35(12):2083-95
- 650 16. Williamson EJ, Walker AJ, Bhaskaran K, Bacon S, Bates C, Morton CE, et al.  
651 Factors associated with COVID-19-related death using OpenSAFELY. *Nature.*  
652 2020;584(7821):430-6
- 653 17. Ryan L. Vaccinated but Not Protected—Living Immunocompromised During  
654 the Pandemic. *JAMA.* 2021;325(24):2443
- 655 18. Knight SR, Ho A, Pius R, Buchan I, Carson G, Drake TM, et al. Risk  
656 stratification of patients admitted to hospital with covid-19 using the ISARIC WHO  
657 Clinical Characterisation Protocol: development and validation of the 4C Mortality  
658 Score. *BMJ.* 2020 Sep 9;370:m3339.32907855
- 659 19. Hall VJ, Foulkes S, Saei A, Andrews N, Oguti B, Charlett A, et al. COVID-19  
660 vaccine coverage in health-care workers in England and effectiveness of BNT162b2  
661 mRNA vaccine against infection (SIREN): a prospective, multicentre, cohort study.  
662 *The Lancet.* 2021;397(10286):1725-35
- 663 20. Paton RS, Overton CE, Ward T. The rapid replacement of the Delta variant by  
664 Omicron (B.1.1.529) in England. *Sci Transl Med.* 2022 May 3:eabo5395.35503007
- 665 21. Docherty AB, Mulholland RH, Lone NI, Cheyne CP, De Angelis D, Diaz-Ordaz  
666 K, et al. Changes in in-hospital mortality in the first wave of COVID-19: a multicentre  
667 prospective observational cohort study using the WHO Clinical Characterisation  
668 Protocol UK. *Lancet Respir Med.* 2021 Jul;9(7):773-85.34000238
- 669 22. Andersen KM, Bates BA, Rashidi ES, Olex AL, Mannon RB, Patel RC, et al.  
670 Long-term use of immunosuppressive medicines and in-hospital COVID-19  
671 outcomes: a retrospective cohort study using data from the National COVID Cohort  
672 Collaborative. *The Lancet Rheumatology.* 2022;4(1):e33-e41
- 673 23. Egan C, Turtle L, Thorpe M, Harrison EM, Semple MG, Docherty AB. Hospital  
674 admission for symptomatic COVID-19 and impact of vaccination: analysis of linked  
675 data from the Coronavirus Clinical Information Network and the National  
676 Immunisation Management Service. *Anaesthesia.* 2022 Feb 18.35178709
- 677 24. Hart WS, Miller E, Andrews NJ, Waight P, Maini PK, Funk S, et al. Generation  
678 time of the alpha and delta SARS-CoV-2 variants: an epidemiological analysis. *The*  
679 *Lancet Infectious Diseases.* 2022
- 680 25. Campbell F, Archer B, Laurenson-Schafer H, Jinnai Y, Konings F, Batra N, et  
681 al. Increased transmissibility and global spread of SARS-CoV-2 variants of concern  
682 as at June 2021. *Eurosurveillance.* 2021;26(24)
- 683 26. Harvey WT, Carabelli AM, Jackson B, Gupta RK, Thomson EC, Harrison EM,  
684 et al. SARS-CoV-2 variants, spike mutations and immune escape. *Nature Reviews*  
685 *Microbiology.* 2021;19(7):409-24
- 686 27. Jayk Bernal A, Gomes Da Silva MM, Musungaie DB, Kovalchuk E, Gonzalez  
687 A, Delos Reyes V, et al. Molnupiravir for Oral Treatment of Covid-19 in  
688 Nonhospitalized Patients. *New England Journal of Medicine.* 2022;386(6):509-20
- 689 28. Gottlieb RL, Vaca CE, Paredes R, Mera J, Webb BJ, Perez G, et al. Early  
690 Remdesivir to Prevent Progression to Severe Covid-19 in Outpatients. *New England*  
691 *Journal of Medicine.* 2022;386(4):305-15

- 692 29. Lee ARYB, Wong SY, Chai LYA, Lee SC, Lee MX, Muthiah MD, et al. Efficacy  
693 of covid-19 vaccines in immunocompromised patients: systematic review and meta-  
694 analysis. *BMJ*. 2022:e068632
- 695 30. Takashita E, Yamayoshi S, Simon V, Van Bakel H, Sordillo EM, Pekosz A, et  
696 al. Efficacy of Antibodies and Antiviral Drugs against Omicron BA.2.12.1, BA.4, and  
697 BA.5 Subvariants. *New England Journal of Medicine*. 2022; Epub ahead of print.  
698 [10.1056/nejmc2207519](https://doi.org/10.1056/nejmc2207519)  
699

## Tables and figures

**Table 1. Demographics and comorbidities for immunocompetent and immunocompromised patients in the ISARIC WHO CCP-UK study.** The immunocompromised patients are presented as both the, incorporating all conditions leading to immunocompromise, and by each group defined on the case record form.

| label                    | Total N        | Missing N | levels        | Immunocompetent     | Immunocompromised – Total | Immunocompromised - Pre-Existing Immunological Disorder | Immunocompromised - Previous Organ Transplant | Immunocompromised - Cancer | Immunocompromised - HIV | Immunocompromised - Pre-Admission Immunosuppressants | Immunocompromised - Pre-Admission Steroids |
|--------------------------|----------------|-----------|---------------|---------------------|---------------------------|---------------------------------------------------------|-----------------------------------------------|----------------------------|-------------------------|------------------------------------------------------|--------------------------------------------|
| Total N (%)              |                |           |               | 134598 (86.0)       | 21954 (14.0)              | 526 (0.3)                                               | 1559 (1.0)                                    | 5116 (3.3)                 | 498 (0.3)               | 12701 (8.1)                                          | 1554 (1.0)                                 |
| Age on admission (years) | 156538 (100.0) | 14        | Median (IQR)  | 69.5 (53.4 to 82.0) | 71.5 (58.7 to 80.3)       | 61.8 (45.3 to 77.2)                                     | 62.4 (52.1 to 72.0)                           | 72.0 (62.0 to 79.7)        | 57.8 (49.8 to 70.5)     | 72.5 (59.1 to 81.2)                                  | 75.1 (63.0 to 83.6)                        |
|                          |                |           | <50           | 27624 (20.5)        | 2801 (12.8)               | 150 (28.5)                                              | 337 (21.6)                                    | 400 (7.8)                  | 127 (25.5)              | 1618 (12.7)                                          | 169 (10.9)                                 |
|                          |                |           | 50-69         | 40578 (30.1)        | 7387 (33.6)               | 172 (32.7)                                              | 761 (48.8)                                    | 1814 (35.5)                | 243 (48.8)              | 3985 (31.4)                                          | 412 (26.5)                                 |
|                          |                |           | 70-79         | 26902 (20.0)        | 6113 (27.8)               | 122 (23.2)                                              | 297 (19.1)                                    | 1654 (32.3)                | 64 (12.9)               | 3559 (28.0)                                          | 417 (26.8)                                 |
|                          |                |           | 80+           | 39482 (29.3)        | 5651 (25.7)               | 82 (15.6)                                               | 164 (10.5)                                    | 1248 (24.4)                | 64 (12.9)               | 3537 (27.8)                                          | 556 (35.8)                                 |
|                          |                |           | (Missing)     | 12 (0.0)            | 2 (0.0)                   | 0 (0.0)                                                 | 0 (0.0)                                       | 0 (0.0)                    | 0 (0.0)                 | 2 (0.0)                                              | 0 (0.0)                                    |
| Sex at Birth             | 156514 (100.0) | 38        | Male          | 74429 (55.3)        | 11564 (52.7)              | 268 (51.0)                                              | 964 (61.8)                                    | 2972 (58.1)                | 283 (56.8)              | 6228 (49.0)                                          | 849 (54.6)                                 |
|                          |                |           | Female        | 60001 (44.6)        | 10353 (47.2)              | 258 (49.0)                                              | 593 (38.0)                                    | 2133 (41.7)                | 214 (43.0)              | 6452 (50.8)                                          | 703 (45.2)                                 |
|                          |                |           | Not specified | 136 (0.1)           | 31 (0.1)                  | 0 (0.0)                                                 | 1 (0.1)                                       | 10 (0.2)                   | 1 (0.2)                 | 18 (0.1)                                             | 1 (0.1)                                    |
|                          |                |           | (Missing)     | 32 (0.0)            | 6 (0.0)                   | 0 (0.0)                                                 | 1 (0.1)                                       | 1 (0.0)                    | 0 (0.0)                 | 3 (0.0)                                              | 1 (0.1)                                    |
| Ethnicity                | 136128 (87.0)  | 20424     | White         | 95260 (70.8)        | 16578 (75.5)              | 308 (58.6)                                              | 1018 (65.3)                                   | 4078 (79.7)                | 230 (46.2)              | 9742 (76.7)                                          | 1202 (77.3)                                |
|                          |                |           | South Asian   | 7978 (5.9)          | 1023 (4.7)                | 26 (4.9)                                                | 169 (10.8)                                    | 139 (2.7)                  | 23 (4.6)                | 603 (4.7)                                            | 63 (4.1)                                   |
|                          |                |           | Black         | 3998 (3.0)          | 603 (2.7)                 | 95 (18.1)                                               | 73 (4.7)                                      | 95 (1.9)                   | 118 (23.7)              | 194 (1.5)                                            | 28 (1.8)                                   |
|                          |                |           | East Asian    | 730 (0.5)           | 83 (0.4)                  | 3 (0.6)                                                 | 13 (0.8)                                      | 16 (0.3)                   | 2 (0.4)                 | 40 (0.3)                                             | 9 (0.6)                                    |
|                          |                |           | Other         | 8679 (6.4)          | 1196 (5.4)                | 39 (7.4)                                                | 125 (8.0)                                     | 261 (5.1)                  | 54 (10.8)               | 630 (5.0)                                            | 87 (5.6)                                   |
|                          |                |           | (Missing)     | 17953 (13.3)        | 2471 (11.3)               | 55 (10.5)                                               | 161 (10.3)                                    | 527 (10.3)                 | 71 (14.3)               | 1492 (11.7)                                          | 165 (10.6)                                 |
| Number of comorbidities  | 156552 (100.0) | 0         | 0             | 24608 (18.3)        | 0 (0.0)                   | 0 (0.0)                                                 | 0 (0.0)                                       | 0 (0.0)                    | 0 (0.0)                 | 0 (0.0)                                              | 0 (0.0)                                    |
|                          |                |           | 1             | 27784 (20.6)        | 1153 (5.3)                | 37 (7.0)                                                | 66 (4.2)                                      | 194 (3.8)                  | 1 (0.2)                 | 709 (5.6)                                            | 146 (9.4)                                  |
|                          |                |           | 2+            | 82206 (61.1)        | 20801 (94.7)              | 489 (93.0)                                              | 1493 (95.8)                                   | 4922 (96.2)                | 497 (99.8)              | 11992 (94.4)                                         | 1408 (90.6)                                |
| Chronic Cardiac Disease  | 141945 (90.7)  | 14607     | No            | 85390 (63.4)        | 14351 (65.4)              | 372 (70.7)                                              | 1054 (67.6)                                   | 3580 (70.0)                | 365 (73.3)              | 8018 (63.1)                                          | 962 (61.9)                                 |

| label                         | Total N       | Missing N | levels    | Immunocompetent | Immunocompromised – Total | Immunocompromised - Pre-Existing Immunological Disorder | Immunocompromised - Previous Organ Transplant | Immunocompromised - Cancer | Immunocompromised - HIV | Immunocompromised - Pre-Admission Immunosuppressants | Immunocompromised - Pre-Admission Steroids |
|-------------------------------|---------------|-----------|-----------|-----------------|---------------------------|---------------------------------------------------------|-----------------------------------------------|----------------------------|-------------------------|------------------------------------------------------|--------------------------------------------|
|                               |               |           | Yes       | 35597 (26.4)    | 6607 (30.1)               | 130 (24.7)                                              | 439 (28.2)                                    | 1318 (25.8)                | 107 (21.5)              | 4124 (32.5)                                          | 489 (31.5)                                 |
|                               |               |           | (Missing) | 13611 (10.1)    | 996 (4.5)                 | 24 (4.6)                                                | 66 (4.2)                                      | 218 (4.3)                  | 26 (5.2)                | 559 (4.4)                                            | 103 (6.6)                                  |
| Hypertension                  | 142801 (91.2) | 13751     | No        | 64695 (48.1)    | 11231 (51.2)              | 295 (56.1)                                              | 618 (39.6)                                    | 2870 (56.1)                | 265 (53.2)              | 6389 (50.3)                                          | 794 (51.1)                                 |
|                               |               |           | Yes       | 57117 (42.4)    | 9758 (44.4)               | 206 (39.2)                                              | 893 (57.3)                                    | 2049 (40.1)                | 213 (42.8)              | 5731 (45.1)                                          | 666 (42.9)                                 |
|                               |               |           | (Missing) | 12786 (9.5)     | 965 (4.4)                 | 25 (4.8)                                                | 48 (3.1)                                      | 197 (3.9)                  | 20 (4.0)                | 581 (4.6)                                            | 94 (6.0)                                   |
| Chronic Pulmonary Disease     | 141948 (90.7) | 14604     | No        | 102408 (76.1)   | 14855 (67.7)              | 387 (73.6)                                              | 1267 (81.3)                                   | 3969 (77.6)                | 418 (83.9)              | 7826 (61.6)                                          | 988 (63.6)                                 |
|                               |               |           | Yes       | 18495 (13.7)    | 6190 (28.2)               | 122 (23.2)                                              | 229 (14.7)                                    | 946 (18.5)                 | 59 (11.8)               | 4362 (34.3)                                          | 472 (30.4)                                 |
|                               |               |           | (Missing) | 13695 (10.2)    | 909 (4.1)                 | 17 (3.2)                                                | 63 (4.0)                                      | 201 (3.9)                  | 21 (4.2)                | 513 (4.0)                                            | 94 (6.0)                                   |
| Chronic Renal Disease         | 141492 (90.4) | 15060     | No        | 101697 (75.6)   | 16628 (75.7)              | 418 (79.5)                                              | 639 (41.0)                                    | 4095 (80.0)                | 393 (78.9)              | 9884 (77.8)                                          | 1199 (77.2)                                |
|                               |               |           | Yes       | 18901 (14.0)    | 4266 (19.4)               | 88 (16.7)                                               | 865 (55.5)                                    | 790 (15.4)                 | 79 (15.9)               | 2190 (17.2)                                          | 254 (16.3)                                 |
|                               |               |           | (Missing) | 14000 (10.4)    | 1060 (4.8)                | 20 (3.8)                                                | 55 (3.5)                                      | 231 (4.5)                  | 26 (5.2)                | 627 (4.9)                                            | 101 (6.5)                                  |
| Asthma                        | 141767 (90.6) | 14785     | No        | 103088 (76.6)   | 16476 (75.0)              | 424 (80.6)                                              | 1342 (86.1)                                   | 4388 (85.8)                | 403 (80.9)              | 8780 (69.1)                                          | 1139 (73.3)                                |
|                               |               |           | Yes       | 17720 (13.2)    | 4483 (20.4)               | 81 (15.4)                                               | 158 (10.1)                                    | 511 (10.0)                 | 73 (14.7)               | 3348 (26.4)                                          | 312 (20.1)                                 |
|                               |               |           | (Missing) | 13790 (10.2)    | 995 (4.5)                 | 21 (4.0)                                                | 59 (3.8)                                      | 217 (4.2)                  | 22 (4.4)                | 573 (4.5)                                            | 103 (6.6)                                  |
| Liver Disease                 | 140634 (89.8) | 15918     | No        | 116080 (86.2)   | 19849 (90.4)              | 471 (89.5)                                              | 1363 (87.4)                                   | 4625 (90.4)                | 434 (87.1)              | 11566 (91.1)                                         | 1390 (89.4)                                |
|                               |               |           | Yes       | 3800 (2.8)      | 905 (4.1)                 | 29 (5.5)                                                | 121 (7.8)                                     | 229 (4.5)                  | 37 (7.4)                | 436 (3.4)                                            | 53 (3.4)                                   |
|                               |               |           | (Missing) | 14718 (10.9)    | 1200 (5.5)                | 26 (4.9)                                                | 75 (4.8)                                      | 262 (5.1)                  | 27 (5.4)                | 699 (5.5)                                            | 111 (7.1)                                  |
| Chronic Neurological Disorder | 141119 (90.1) | 15433     | No        | 106340 (79.0)   | 18677 (85.1)              | 423 (80.4)                                              | 1365 (87.6)                                   | 4479 (87.5)                | 418 (83.9)              | 10750 (84.6)                                         | 1242 (79.9)                                |
|                               |               |           | Yes       | 13957 (10.4)    | 2145 (9.8)                | 79 (15.0)                                               | 125 (8.0)                                     | 385 (7.5)                  | 56 (11.2)               | 1306 (10.3)                                          | 194 (12.5)                                 |
|                               |               |           | (Missing) | 14301 (10.6)    | 1132 (5.2)                | 24 (4.6)                                                | 69 (4.4)                                      | 252 (4.9)                  | 24 (4.8)                | 645 (5.1)                                            | 118 (7.6)                                  |
| Malignant Neoplasm            | 140939 (90.0) | 15613     | No        | 111603 (82.9)   | 15739 (71.7)              | 451 (85.7)                                              | 1276 (81.8)                                   | 1509 (29.5)                | 439 (88.2)              | 10792 (85.0)                                         | 1272 (81.9)                                |
|                               |               |           | Yes       | 8484 (6.3)      | 5113 (23.3)               | 45 (8.6)                                                | 209 (13.4)                                    | 3440 (67.2)                | 33 (6.6)                | 1236 (9.7)                                           | 150 (9.7)                                  |
|                               |               |           | (Missing) | 14511 (10.8)    | 1102 (5.0)                | 30 (5.7)                                                | 74 (4.7)                                      | 167 (3.3)                  | 26 (5.2)                | 673 (5.3)                                            | 132 (8.5)                                  |
| Chronic Haematologic Disease  | 140895 (90.0) | 15657     | No        | 116431 (86.5)   | 18758 (85.4)              | 351 (66.7)                                              | 1389 (89.1)                                   | 3742 (73.1)                | 442 (88.8)              | 11458 (90.2)                                         | 1376 (88.5)                                |



| label                         | Total N       | Missing N | levels       | Immunocompetent | Immunocompromised – Total | Immunocompromised - Pre-Existing Immunological Disorder | Immunocompromised - Previous Organ Transplant | Immunocompromised - Cancer | Immunocompromised - HIV | Immunocompromised - Pre-Admission Immunosuppressants | Immunocompromised - Pre-Admission Steroids |
|-------------------------------|---------------|-----------|--------------|-----------------|---------------------------|---------------------------------------------------------|-----------------------------------------------|----------------------------|-------------------------|------------------------------------------------------|--------------------------------------------|
|                               |               |           | Yes          | 3665 (2.7)      | 2041 (9.3)                | 150 (28.5)                                              | 102 (6.5)                                     | 1132 (22.1)                | 32 (6.4)                | 574 (4.5)                                            | 51 (3.3)                                   |
|                               |               |           | (Missing)    | 14502 (10.8)    | 1155 (5.3)                | 25 (4.8)                                                | 68 (4.4)                                      | 242 (4.7)                  | 24 (4.8)                | 669 (5.3)                                            | 127 (8.2)                                  |
| Obesity                       | 125264 (80.0) | 31288     | No           | 89557 (66.5)    | 15300 (69.7)              | 367 (69.8)                                              | 1120 (71.8)                                   | 3841 (75.1)                | 337 (67.7)              | 8543 (67.3)                                          | 1092 (70.3)                                |
|                               |               |           | Yes          | 17462 (13.0)    | 2945 (13.4)               | 69 (13.1)                                               | 185 (11.9)                                    | 466 (9.1)                  | 80 (16.1)               | 2006 (15.8)                                          | 139 (8.9)                                  |
|                               |               |           | (Missing)    | 27579 (20.5)    | 3709 (16.9)               | 90 (17.1)                                               | 254 (16.3)                                    | 809 (15.8)                 | 81 (16.3)               | 2152 (16.9)                                          | 323 (20.8)                                 |
| Diabetes                      | 143343 (91.6) | 13209     | No           | 85844 (63.8)    | 15135 (68.9)              | 358 (68.1)                                              | 950 (60.9)                                    | 3766 (73.6)                | 324 (65.1)              | 8706 (68.5)                                          | 1031 (66.3)                                |
|                               |               |           | Yes          | 36322 (27.0)    | 6042 (27.5)               | 153 (29.1)                                              | 563 (36.1)                                    | 1188 (23.2)                | 162 (32.5)              | 3537 (27.8)                                          | 439 (28.2)                                 |
|                               |               |           | (Missing)    | 12432 (9.2)     | 777 (3.5)                 | 15 (2.9)                                                | 46 (3.0)                                      | 162 (3.2)                  | 12 (2.4)                | 458 (3.6)                                            | 84 (5.4)                                   |
| Rheumatologic Disorder        | 140476 (89.7) | 16076     | No           | 106762 (79.3)   | 16273 (74.1)              | 411 (78.1)                                              | 1339 (85.9)                                   | 4310 (84.2)                | 438 (88.0)              | 8586 (67.6)                                          | 1189 (76.5)                                |
|                               |               |           | Yes          | 12901 (9.6)     | 4540 (20.7)               | 82 (15.6)                                               | 138 (8.9)                                     | 559 (10.9)                 | 33 (6.6)                | 3491 (27.5)                                          | 237 (15.3)                                 |
|                               |               |           | (Missing)    | 14935 (11.1)    | 1141 (5.2)                | 33 (6.3)                                                | 82 (5.3)                                      | 247 (4.8)                  | 27 (5.4)                | 624 (4.9)                                            | 128 (8.2)                                  |
| Dementia                      | 140670 (89.9) | 15882     | No           | 104563 (77.7)   | 19205 (87.5)              | 458 (87.1)                                              | 1432 (91.9)                                   | 4583 (89.6)                | 439 (88.2)              | 11047 (87.0)                                         | 1246 (80.2)                                |
|                               |               |           | Yes          | 15328 (11.4)    | 1574 (7.2)                | 41 (7.8)                                                | 53 (3.4)                                      | 286 (5.6)                  | 29 (5.8)                | 974 (7.7)                                            | 191 (12.3)                                 |
|                               |               |           | (Missing)    | 14707 (10.9)    | 1175 (5.4)                | 27 (5.1)                                                | 74 (4.7)                                      | 247 (4.8)                  | 30 (6.0)                | 680 (5.4)                                            | 117 (7.5)                                  |
| Malnutrition                  | 131191 (83.8) | 25361     | No           | 109531 (81.4)   | 18749 (85.4)              | 443 (84.2)                                              | 1353 (86.8)                                   | 4346 (84.9)                | 425 (85.3)              | 10888 (85.7)                                         | 1294 (83.3)                                |
|                               |               |           | Yes          | 2417 (1.8)      | 494 (2.3)                 | 11 (2.1)                                                | 34 (2.2)                                      | 160 (3.1)                  | 15 (3.0)                | 249 (2.0)                                            | 25 (1.6)                                   |
|                               |               |           | (Missing)    | 22650 (16.8)    | 2711 (12.3)               | 72 (13.7)                                               | 172 (11.0)                                    | 610 (11.9)                 | 58 (11.6)               | 1564 (12.3)                                          | 235 (15.1)                                 |
| Smoking                       | 81789 (52.2)  | 74763     | No           | 35378 (26.3)    | 5587 (25.4)               | 165 (31.4)                                              | 447 (28.7)                                    | 1271 (24.8)                | 164 (32.9)              | 3214 (25.3)                                          | 326 (21.0)                                 |
|                               |               |           | Yes          | 33798 (25.1)    | 7026 (32.0)               | 118 (22.4)                                              | 347 (22.3)                                    | 1621 (31.7)                | 109 (21.9)              | 4363 (34.4)                                          | 468 (30.1)                                 |
|                               |               |           | (Missing)    | 65422 (48.6)    | 9341 (42.5)               | 243 (46.2)                                              | 765 (49.1)                                    | 2224 (43.5)                | 225 (45.2)              | 5124 (40.3)                                          | 760 (48.9)                                 |
| Vaccination Dose on Admission | 153293 (97.9) | 3259      | Unvaccinated | 114364 (85.0)   | 17737 (80.8)              | 452 (85.9)                                              | 1078 (69.1)                                   | 4077 (79.7)                | 419 (84.1)              | 10267 (80.8)                                         | 1444 (92.9)                                |
|                               |               |           | First Dose   | 5112 (3.8)      | 789 (3.6)                 | 6 (1.1)                                                 | 60 (3.8)                                      | 166 (3.2)                  | 17 (3.4)                | 516 (4.1)                                            | 24 (1.5)                                   |
|                               |               |           | Second Dose  | 11601 (8.6)     | 2804 (12.8)               | 49 (9.3)                                                | 344 (22.1)                                    | 679 (13.3)                 | 41 (8.2)                | 1631 (12.8)                                          | 60 (3.9)                                   |
|                               |               |           | Third Dose   | 592 (0.4)       | 290 (1.3)                 | 6 (1.1)                                                 | 51 (3.3)                                      | 92 (1.8)                   | 1 (0.2)                 | 139 (1.1)                                            | 1 (0.1)                                    |
|                               |               |           | Fourth Dose  | 2 (0.0)         | 2 (0.0)                   | 0 (0.0)                                                 | 0 (0.0)                                       | 2 (0.0)                    | 0 (0.0)                 | 0 (0.0)                                              | 0 (0.0)                                    |

| label | Total N | Missing N | levels    | Immunocompetent | Immunocompromised – Total | Immunocompromised - Pre-Existing Immunological Disorder | Immunocompromised - Previous Organ Transplant | Immunocompromised - Cancer | Immunocompromised - HIV | Immunocompromised - Pre-Admission Immunosuppressants | Immunocompromised - Pre-Admission Steroids |
|-------|---------|-----------|-----------|-----------------|---------------------------|---------------------------------------------------------|-----------------------------------------------|----------------------------|-------------------------|------------------------------------------------------|--------------------------------------------|
|       |         |           | (Missing) | 2927 (2.2)      | 332 (1.5)                 | 13 (2.5)                                                | 26 (1.7)                                      | 100 (2.0)                  | 20 (4.0)                | 148 (1.2)                                            | 25 (1.6)                                   |

**Table 2. Outcomes stratified by immune status and pandemic wave.**

| label                    | levels | Immunocompetent - Wave 1 | Immunocompromised - Wave 1 | Immunocompetent - Wave 2 | Immunocompromised - Wave 2 | Immunocompetent - Wave 3 | Immunocompromised - Wave 3 | Immunocompetent - Wave 4 | Immunocompromised - Wave 4 |
|--------------------------|--------|--------------------------|----------------------------|--------------------------|----------------------------|--------------------------|----------------------------|--------------------------|----------------------------|
| Oxygen                   | No     | 10974 (31.2)             | 1910 (28.0)                | 16398 (25.7)             | 2227 (22.8)                | 7745 (29.0)              | 1029 (24.0)                | 3659 (51.6)              | 361 (40.1)                 |
|                          | Yes    | 24227 (68.8)             | 4918 (72.0)                | 47468 (74.3)             | 7549 (77.2)                | 18999 (71.0)             | 3258 (76.0)                | 3434 (48.4)              | 540 (59.9)                 |
| Critical Care Admission  | No     | 30785 (86.9)             | 5952 (86.9)                | 52873 (82.5)             | 8101 (82.7)                | 22469 (83.9)             | 3514 (82.0)                | 6611 (92.4)              | 823 (90.8)                 |
|                          | Yes    | 4637 (13.1)              | 896 (13.1)                 | 11223 (17.5)             | 1693 (17.3)                | 4306 (16.1)              | 773 (18.0)                 | 544 (7.6)                | 83 (9.2)                   |
| Non-Invasive Ventilation | No     | 29970 (85.4)             | 5660 (83.2)                | 50363 (79.4)             | 7449 (76.8)                | 20925 (78.9)             | 3181 (74.7)                | 6362 (90.1)              | 762 (84.9)                 |
|                          | Yes    | 5106 (14.6)              | 1145 (16.8)                | 13035 (20.6)             | 2252 (23.2)                | 5608 (21.1)              | 1078 (25.3)                | 696 (9.9)                | 136 (15.1)                 |
| Invasive Ventilation     | No     | 32524 (92.4)             | 6384 (93.6)                | 59058 (93.0)             | 8973 (92.2)                | 25074 (94.7)             | 3948 (92.8)                | 6875 (97.6)              | 866 (96.7)                 |
|                          | Yes    | 2664 (7.6)               | 435 (6.4)                  | 4416 (7.0)               | 754 (7.8)                  | 1415 (5.3)               | 308 (7.2)                  | 170 (2.4)                | 30 (3.3)                   |
| Death                    | No     | 24766 (70.2)             | 4379 (64.3)                | 48439 (77.4)             | 6551 (68.6)                | 23276 (87.9)             | 3317 (78.3)                | 5726 (88.7)              | 662 (81.2)                 |
|                          | Yes    | 10495 (29.8)             | 2430 (35.7)                | 14177 (22.6)             | 2998 (31.4)                | 3210 (12.1)              | 918 (21.7)                 | 726 (11.3)               | 153 (18.8)                 |

**Figure 1. Illness severity and characteristics of the patients.** (A) Illness severity over the course of the pandemic, measured using the 4C Mortality Score by immune status and pandemic wave. Pink bars: immunocompetent, green bars: immunocompromised. (B) Physiological components of the 4C Mortality Score stratified by immune status and pandemic wave. (C) Overlap between immunocompromising conditions

A

### Immunocompromise Overlap

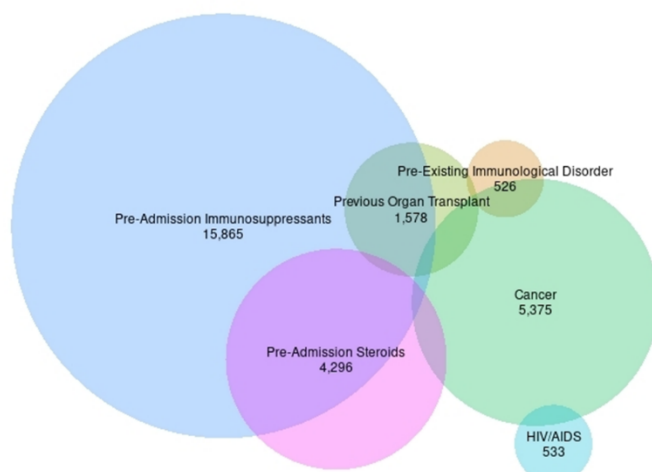

B

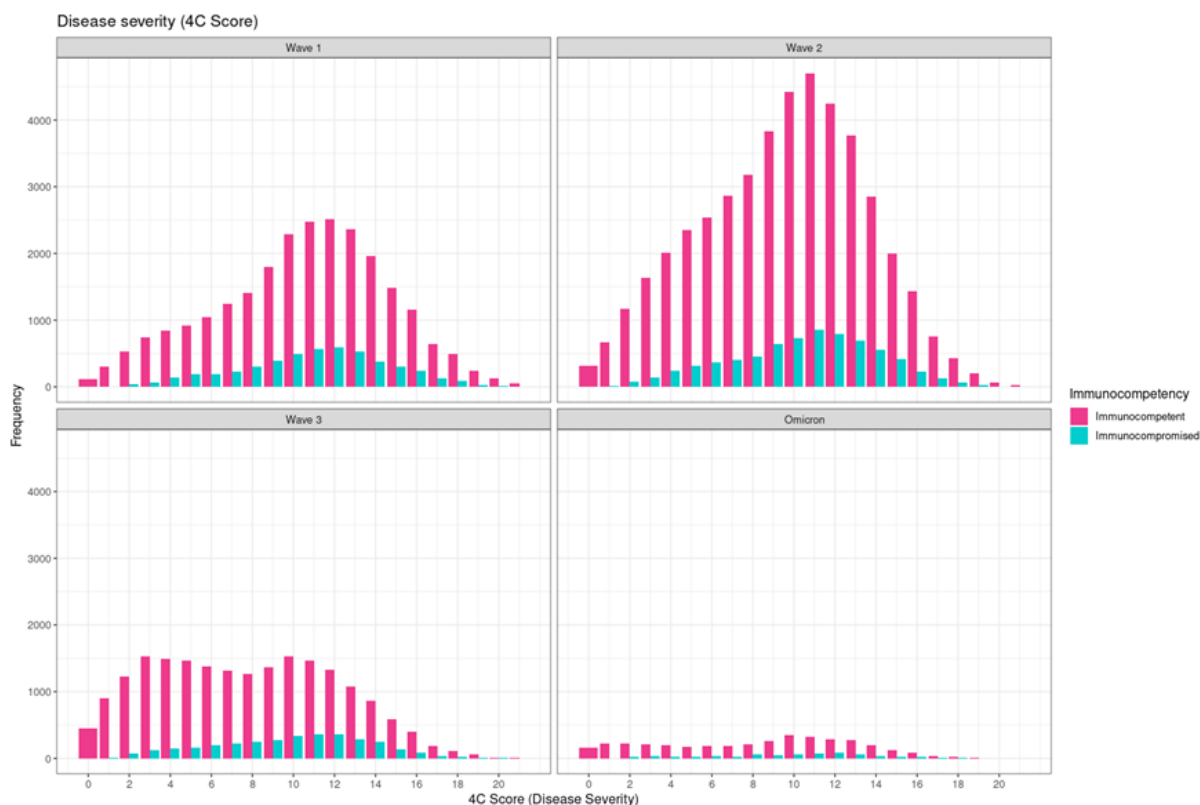

C

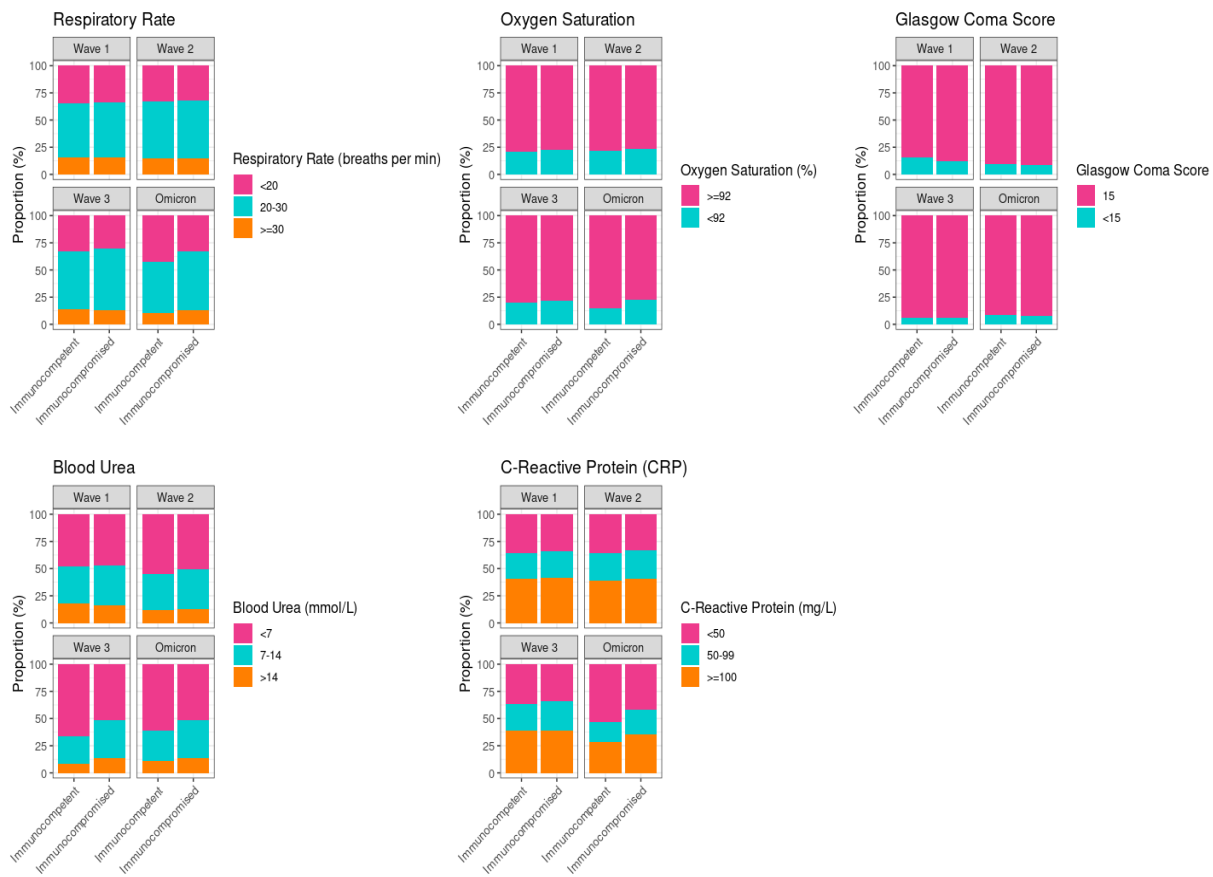

**Figure 2. Outcomes of hospitalised immunocompromised patients, compared with immunocompetent patients.** Odds ratios (ORs) from multivariable logistic regression and 95% confidence intervals (CI) for (A) outcomes of death, oxygen use, critical care admission, non-invasive and invasive ventilation, and (B) for death in the first 4 pandemic waves in the UK. ORs are adjusted for age, sex, ethnicity, deprivation, and comorbidities.

**A**

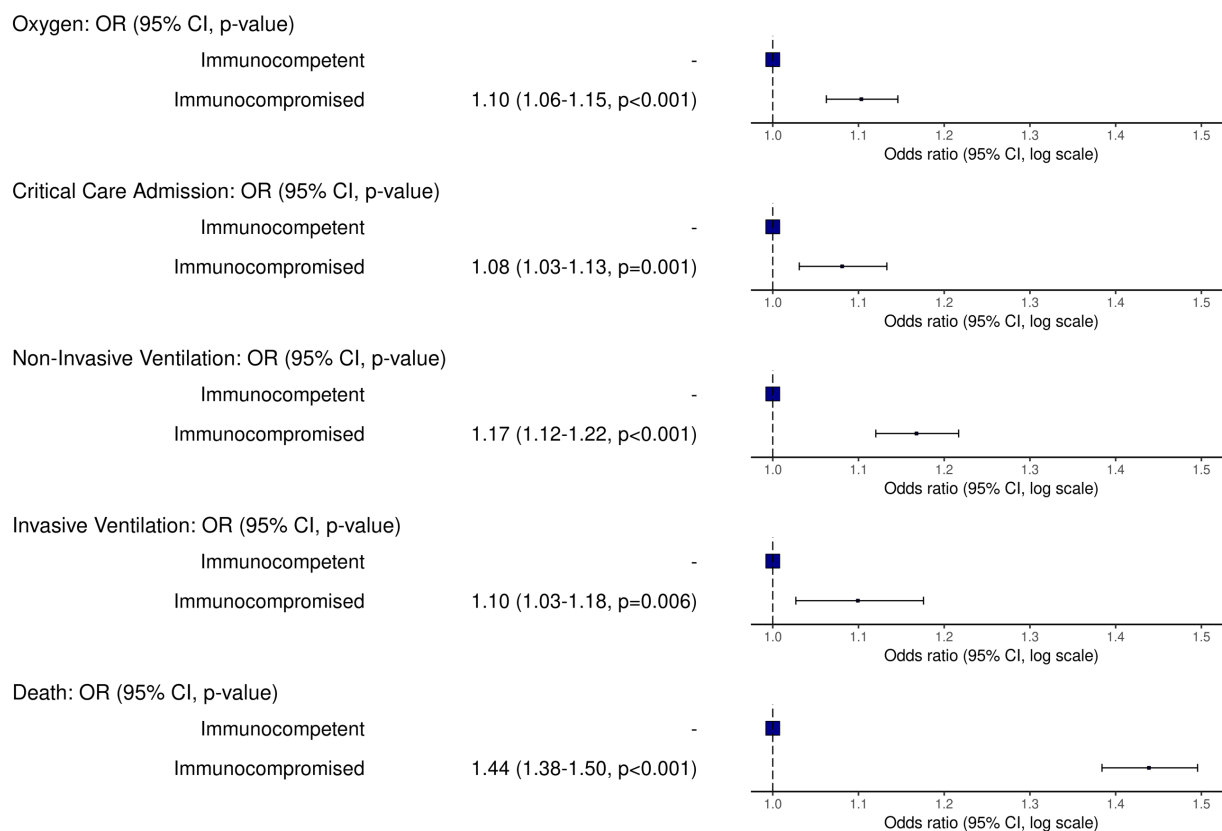

**B**

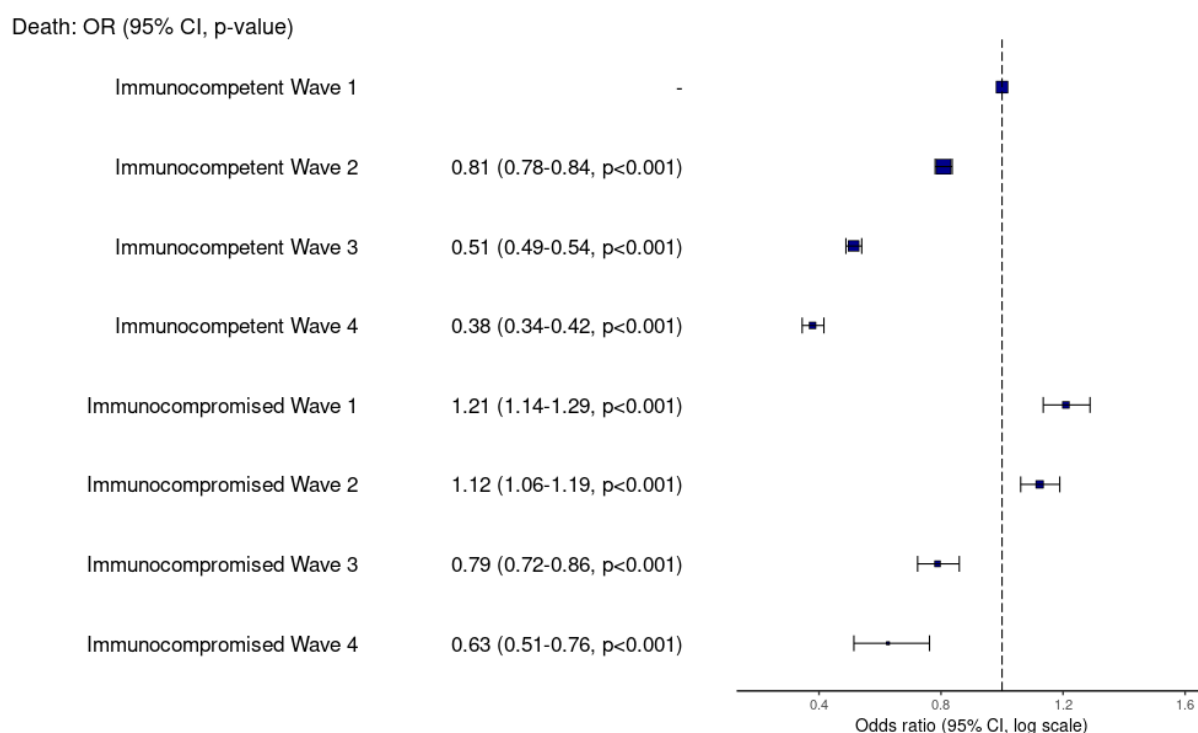

**Figure 3: Absolute risk difference (ARD) for death between immunocompromised and immunocompetent.** The difference in risk of death in the first wave, and the fourth wave, for immunocompetent and immunocompromised patients was modelled using Bayesian logistic regression, and the probability that the risk of death across the two waves reduced more in the immunocompetent than the immunocompromised was calculated. The analysis was stratified by age and sex.

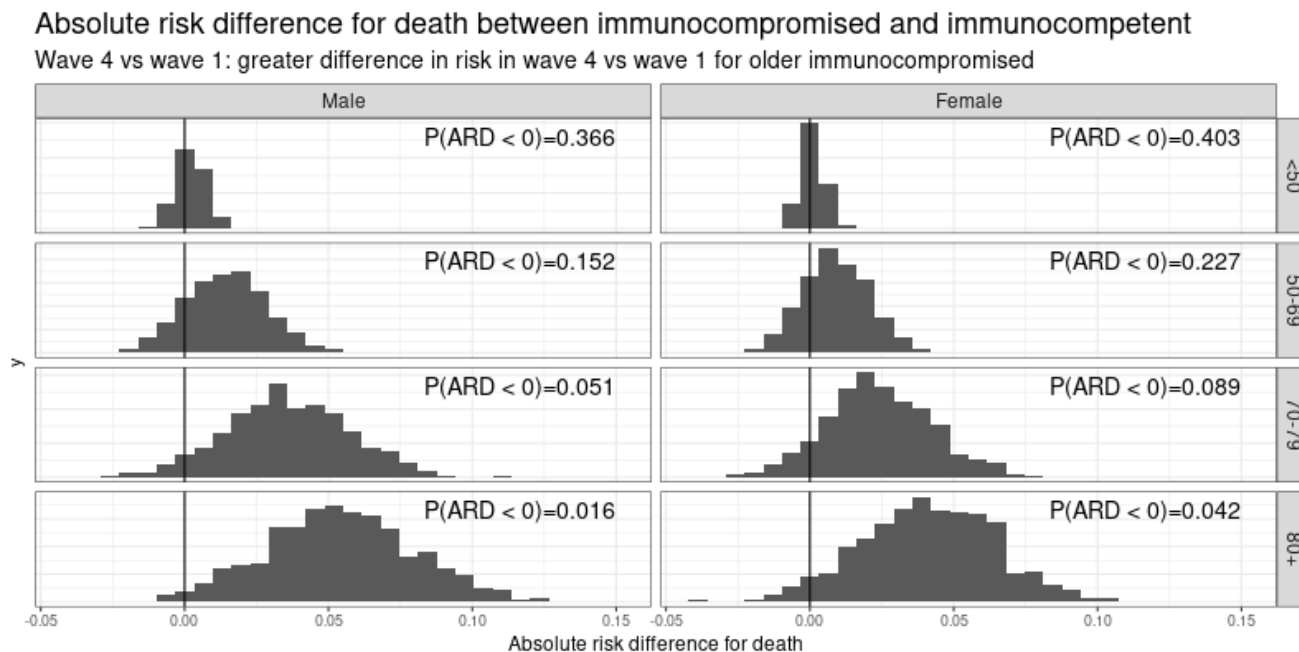



## Supplementary data

**Table S1. Comorbidities in immunocompetent versus immunocompromised patients stratified by pandemic wave.**

| label                     | levels        | Immunocompetent - Wave 1 | Immunocompromised - Wave 1 | Immunocompetent - Wave 2 | Immunocompromised - Wave 2 | Immunocompetent - Wave 3 | Immunocompromised - Wave 3 | Immunocompetent - Wave 4 | Immunocompromised - Wave 4 |
|---------------------------|---------------|--------------------------|----------------------------|--------------------------|----------------------------|--------------------------|----------------------------|--------------------------|----------------------------|
| Age on admission (years)  | Median (IQR)  | 75.3 (59.7 to 84.9)      | 74.1 (62.0 to 82.5)        | 70.2 (55.6 to 81.9)      | 71.3 (59.0 to 80.1)        | 58.7 (42.2 to 75.2)      | 66.9 (53.9 to 76.6)        | 66.8 (45.5 to 81.5)      | 69.2 (56.2 to 78.6)        |
|                           | <50           | 4716 (13.3)              | 641 (9.3)                  | 10867 (16.8)             | 1209 (12.3)                | 9867 (36.4)              | 806 (18.6)                 | 2174 (29.4)              | 145 (15.7)                 |
|                           | 50-69         | 9402 (26.5)              | 2010 (29.3)                | 21188 (32.8)             | 3389 (34.4)                | 8129 (30.0)              | 1658 (38.3)                | 1859 (25.2)              | 330 (35.8)                 |
|                           | 70-79         | 7472 (21.0)              | 1977 (28.8)                | 13751 (21.3)             | 2764 (28.1)                | 4381 (16.2)              | 1110 (25.7)                | 1298 (17.6)              | 262 (28.4)                 |
|                           | 80+           | 13931 (39.2)             | 2230 (32.5)                | 18755 (29.1)             | 2485 (25.2)                | 4738 (17.5)              | 751 (17.4)                 | 2058 (27.9)              | 185 (20.1)                 |
| Sex at Birth              | Male          | 19501 (54.9)             | 3684 (53.7)                | 36124 (56.0)             | 5196 (52.8)                | 15137 (55.8)             | 2234 (51.7)                | 3667 (49.6)              | 450 (48.8)                 |
|                           | Female        | 15976 (45.0)             | 3163 (46.1)                | 28371 (43.9)             | 4636 (47.1)                | 11948 (44.1)             | 2083 (48.2)                | 3706 (50.2)              | 471 (51.1)                 |
|                           | Not specified | 41 (0.1)                 | 8 (0.1)                    | 60 (0.1)                 | 15 (0.2)                   | 22 (0.1)                 | 7 (0.2)                    | 13 (0.2)                 | 1 (0.1)                    |
| Ethnicity                 | White         | 25322 (82.0)             | 5207 (85.0)                | 46492 (82.5)             | 7399 (85.0)                | 18501 (79.8)             | 3262 (85.0)                | 4945 (79.7)              | 710 (86.8)                 |
|                           | South Asian   | 1856 (6.0)               | 300 (4.9)                  | 4094 (7.3)               | 490 (5.6)                  | 1610 (6.9)               | 201 (5.2)                  | 418 (6.7)                | 32 (3.9)                   |
|                           | Black         | 1159 (3.8)               | 220 (3.6)                  | 1542 (2.7)               | 229 (2.6)                  | 999 (4.3)                | 127 (3.3)                  | 298 (4.8)                | 27 (3.3)                   |
|                           | East Asian    | 243 (0.8)                | 30 (0.5)                   | 307 (0.5)                | 38 (0.4)                   | 158 (0.7)                | 14 (0.4)                   | 22 (0.4)                 | 1 (0.1)                    |
|                           | Other         | 2313 (7.5)               | 368 (6.0)                  | 3920 (7.0)               | 547 (6.3)                  | 1924 (8.3)               | 233 (6.1)                  | 522 (8.4)                | 48 (5.9)                   |
| Number of comorbidities   | 0             | 4378 (12.3)              | 0 (0.0)                    | 10230 (15.8)             | 0 (0.0)                    | 8238 (30.4)              | 0 (0.0)                    | 1762 (23.8)              | 0 (0.0)                    |
|                           | 1             | 6868 (19.3)              | 285 (4.2)                  | 13649 (21.1)             | 489 (5.0)                  | 5809 (21.4)              | 335 (7.7)                  | 1458 (19.7)              | 44 (4.8)                   |
|                           | 2+            | 24279 (68.3)             | 6573 (95.8)                | 40688 (63.0)             | 9359 (95.0)                | 13070 (48.2)             | 3991 (92.3)                | 4169 (56.4)              | 878 (95.2)                 |
| Chronic Cardiac Disease   | No            | 22615 (66.7)             | 4261 (64.8)                | 43530 (71.4)             | 6571 (69.2)                | 15241 (75.5)             | 2924 (72.8)                | 4004 (68.1)              | 595 (68.0)                 |
|                           | Yes           | 11298 (33.3)             | 2315 (35.2)                | 17470 (28.6)             | 2918 (30.8)                | 4955 (24.5)              | 1094 (27.2)                | 1874 (31.9)              | 280 (32.0)                 |
| Hypertension              | No            | 17156 (50.4)             | 3495 (53.1)                | 32532 (52.9)             | 5060 (53.2)                | 11717 (57.5)             | 2176 (54.1)                | 3290 (55.7)              | 500 (57.3)                 |
|                           | Yes           | 16889 (49.6)             | 3083 (46.9)                | 28933 (47.1)             | 4456 (46.8)                | 8674 (42.5)              | 1846 (45.9)                | 2621 (44.3)              | 373 (42.7)                 |
| Chronic Pulmonary Disease | No            | 28521 (84.6)             | 4602 (69.9)                | 52034 (85.3)             | 6752 (70.8)                | 17117 (84.5)             | 2920 (72.3)                | 4736 (80.2)              | 581 (65.6)                 |
|                           | Yes           | 5189 (15.4)              | 1983 (30.1)                | 8999 (14.7)              | 2784 (29.2)                | 3138 (15.5)              | 1118 (27.7)                | 1169 (19.8)              | 305 (34.4)                 |
| Chronic Renal Disease     | No            | 27710 (82.3)             | 5149 (78.8)                | 51719 (85.0)             | 7677 (81.1)                | 17395 (86.2)             | 3132 (78.0)                | 4873 (82.7)              | 670 (76.4)                 |
|                           | Yes           | 5961 (17.7)              | 1386 (21.2)                | 9136 (15.0)              | 1791 (18.9)                | 2784 (13.8)              | 882 (22.0)                 | 1020 (17.3)              | 207 (23.6)                 |
| Asthma                    | No            | 29546 (87.7)             | 5269 (80.7)                | 52021 (85.4)             | 7369 (77.5)                | 16569 (81.7)             | 3138 (77.6)                | 4952 (84.0)              | 700 (79.5)                 |
|                           | Yes           | 4150 (12.3)              | 1257 (19.3)                | 8922 (14.6)              | 2140 (22.5)                | 3705 (18.3)              | 905 (22.4)                 | 943 (16.0)               | 181 (20.5)                 |
| Liver Disease             | No            | 32281 (96.7)             | 6204 (95.8)                | 58724 (96.9)             | 8987 (95.5)                | 19463 (96.8)             | 3833 (95.8)                | 5612 (96.6)              | 825 (95.3)                 |
|                           | Yes           | 1112 (3.3)               | 274 (4.2)                  | 1856 (3.1)               | 422 (4.5)                  | 635 (3.2)                | 168 (4.2)                  | 197 (3.4)                | 41 (4.7)                   |

| label                         | levels       | Immunocompetent - Wave 1 | Immunocompromised - Wave 1 | Immunocompetent - Wave 2 | Immunocompromised - Wave 2 | Immunocompetent - Wave 3 | Immunocompromised - Wave 3 | Immunocompetent - Wave 4 | Immunocompromised - Wave 4 |
|-------------------------------|--------------|--------------------------|----------------------------|--------------------------|----------------------------|--------------------------|----------------------------|--------------------------|----------------------------|
| Chronic Neurological Disorder | No           | 28925 (86.2)             | 5729 (88.1)                | 54021 (89.0)             | 8478 (89.9)                | 18345 (90.9)             | 3691 (92.0)                | 5049 (86.4)              | 779 (89.1)                 |
|                               | Yes          | 4640 (13.8)              | 776 (11.9)                 | 6678 (11.0)              | 953 (10.1)                 | 1844 (9.1)               | 321 (8.0)                  | 795 (13.6)               | 95 (10.9)                  |
| Malignant Neoplasm            | No           | 31019 (92.8)             | 4857 (74.6)                | 56420 (93.0)             | 7206 (76.2)                | 18895 (93.8)             | 3048 (76.2)                | 5269 (90.5)              | 628 (71.4)                 |
|                               | Yes          | 2423 (7.2)               | 1656 (25.4)                | 4256 (7.0)               | 2252 (23.8)                | 1250 (6.2)               | 953 (23.8)                 | 555 (9.5)                | 252 (28.6)                 |
| Chronic Haematologic Disease  | No           | 32397 (96.9)             | 5796 (89.4)                | 58907 (97.1)             | 8596 (91.2)                | 19535 (96.9)             | 3600 (89.6)                | 5592 (95.9)              | 766 (87.8)                 |
|                               | Yes          | 1039 (3.1)               | 690 (10.6)                 | 1761 (2.9)               | 829 (8.8)                  | 623 (3.1)                | 416 (10.4)                 | 242 (4.1)                | 106 (12.2)                 |
| Obesity                       | No           | 26042 (87.3)             | 5016 (87.5)                | 44460 (82.9)             | 6693 (81.8)                | 14327 (79.0)             | 2886 (82.0)                | 4728 (87.3)              | 705 (87.0)                 |
|                               | Yes          | 3793 (12.7)              | 717 (12.5)                 | 9167 (17.1)              | 1489 (18.2)                | 3815 (21.0)              | 634 (18.0)                 | 687 (12.7)               | 105 (13.0)                 |
| Diabetes                      | No           | 23631 (69.0)             | 4669 (70.3)                | 43534 (70.7)             | 6874 (71.7)                | 14424 (70.6)             | 2915 (71.8)                | 4255 (71.9)              | 677 (76.2)                 |
|                               | Yes          | 10602 (31.0)             | 1970 (29.7)                | 18061 (29.3)             | 2716 (28.3)                | 5995 (29.4)              | 1145 (28.2)                | 1664 (28.1)              | 211 (23.8)                 |
| Rheumatologic Disorder        | No           | 29815 (89.5)             | 5105 (78.8)                | 53567 (88.7)             | 7351 (77.9)                | 18101 (90.1)             | 3116 (77.5)                | 5279 (90.3)              | 701 (79.8)                 |
|                               | Yes          | 3487 (10.5)              | 1374 (21.2)                | 6858 (11.3)              | 2084 (22.1)                | 1992 (9.9)               | 905 (22.5)                 | 564 (9.7)                | 177 (20.2)                 |
| Dementia                      | No           | 26981 (80.4)             | 5772 (88.7)                | 53735 (89.0)             | 8762 (93.3)                | 18717 (93.1)             | 3834 (95.9)                | 5130 (87.9)              | 837 (94.9)                 |
|                               | Yes          | 6588 (19.6)              | 735 (11.3)                 | 6651 (11.0)              | 629 (6.7)                  | 1380 (6.9)               | 165 (4.1)                  | 709 (12.1)               | 45 (5.1)                   |
| Malnutrition                  | No           | 30161 (97.0)             | 5841 (97.0)                | 55152 (97.9)             | 8391 (97.1)                | 18759 (98.8)             | 3696 (98.7)                | 5459 (98.3)              | 821 (98.0)                 |
|                               | Yes          | 929 (3.0)                | 181 (3.0)                  | 1164 (2.1)               | 249 (2.9)                  | 227 (1.2)                | 47 (1.3)                   | 97 (1.7)                 | 17 (2.0)                   |
| Smoking                       | No           | 9736 (52.1)              | 1741 (44.1)                | 18467 (52.5)             | 2578 (45.1)                | 5785 (47.8)              | 1082 (44.5)                | 1390 (43.2)              | 186 (35.6)                 |
|                               | Yes          | 8969 (47.9)              | 2206 (55.9)                | 16682 (47.5)             | 3132 (54.9)                | 6319 (52.2)              | 1352 (55.5)                | 1828 (56.8)              | 336 (64.4)                 |
| Vaccination Dose on Admission | Unvaccinated | 34396 (100.0)            | 6688 (100.0)               | 59598 (94.9)             | 9143 (94.4)                | 13488 (49.7)             | 1058 (24.5)                | 6882 (93.1)              | 848 (92.0)                 |
|                               | First Dose   | 0 (0.0)                  | 0 (0.0)                    | 3116 (5.0)               | 532 (5.5)                  | 1948 (7.2)               | 253 (5.8)                  | 48 (0.6)                 | 4 (0.4)                    |
|                               | Second Dose  | 0 (0.0)                  | 0 (0.0)                    | 55 (0.1)                 | 11 (0.1)                   | 11251 (41.5)             | 2762 (63.8)                | 295 (4.0)                | 31 (3.4)                   |
|                               | Third Dose   | 0 (0.0)                  | 0 (0.0)                    | 0 (0.0)                  | 0 (0.0)                    | 428 (1.6)                | 251 (5.8)                  | 164 (2.2)                | 39 (4.2)                   |
|                               | Fourth Dose  | 0 (0.0)                  | 0 (0.0)                    | 0 (0.0)                  | 0 (0.0)                    | 2 (0.0)                  | 2 (0.0)                    | 0 (0.0)                  | 0 (0.0)                    |

**Table S2. Disease severity by immune status and pandemic wave.** The 4C mortality score is calculated on admission to hospital from age, sex, number of comorbidities, respiratory rate, oxygen saturation, Glasgow coma scale, urea and CRP. The score ranges from 0 (low risk) to 21 (very high risk). Score 0-3 = low risk (1.2% mortality), 4-8 = intermediate risk (9.9% mortality), 9-14 = high risk (31.4% mortality) and 15-21 = very high risk (61.5% mortality).

| label                              | levels       | Immunocompetent - Wave 1 | Immunocompromised - Wave 1 | Immunocompetent - Wave 2 | Immunocompromised - Wave 2 | Immunocompetent - Wave 3 | Immunocompromised - Wave 3 | Immunocompetent - Wave 4 | Immunocompromised - Wave 4 |
|------------------------------------|--------------|--------------------------|----------------------------|--------------------------|----------------------------|--------------------------|----------------------------|--------------------------|----------------------------|
| ISARIC4C Mortality Score           | Median (IQR) | 11.0 (8.0 to 13.0)       | 11.0 (9.0 to 13.0)         | 10.0 (7.0 to 13.0)       | 11.0 (8.0 to 13.0)         | 8.0 (4.0 to 11.0)        | 10.0 (7.0 to 12.0)         | 9.0 (4.0 to 12.0)        | 10.0 (7.0 to 12.0)         |
| Respiratory Rate (breaths per min) | <20          | 12159 (35.1)             | 2259 (33.6)                | 20832 (33.1)             | 3060 (31.6)                | 8563 (32.5)              | 1291 (30.3)                | 2453 (42.6)              | 283 (33.0)                 |
|                                    | 20-30        | 16963 (48.9)             | 3382 (50.4)                | 33071 (52.5)             | 5173 (53.5)                | 14210 (54.0)             | 2406 (56.5)                | 2726 (47.4)              | 463 (54.0)                 |
|                                    | >=30         | 5558 (16.0)              | 1074 (16.0)                | 9102 (14.4)              | 1439 (14.9)                | 3545 (13.5)              | 564 (13.2)                 | 578 (10.0)               | 112 (13.1)                 |
| Number of comorbidities            | 0            | 4378 (12.3)              | 0 (0.0)                    | 10230 (15.8)             | 0 (0.0)                    | 8238 (30.4)              | 0 (0.0)                    | 1762 (23.8)              | 0 (0.0)                    |
|                                    | 1            | 6868 (19.3)              | 285 (4.2)                  | 13649 (21.1)             | 489 (5.0)                  | 5809 (21.4)              | 335 (7.7)                  | 1458 (19.7)              | 44 (4.8)                   |
|                                    | 2+           | 24279 (68.3)             | 6573 (95.8)                | 40688 (63.0)             | 9359 (95.0)                | 13070 (48.2)             | 3991 (92.3)                | 4169 (56.4)              | 878 (95.2)                 |
| Oxygen Saturation (%)              | >=92         | 27589 (79.2)             | 5254 (77.7)                | 49645 (78.6)             | 7421 (76.6)                | 21201 (80.0)             | 3323 (77.9)                | 4912 (84.9)              | 671 (77.7)                 |
|                                    | <92          | 7244 (20.8)              | 1507 (22.3)                | 13495 (21.4)             | 2262 (23.4)                | 5288 (20.0)              | 942 (22.1)                 | 875 (15.1)               | 193 (22.3)                 |
| Glasgow Coma Score                 | 15           | 27882 (84.5)             | 5664 (88.2)                | 55467 (90.9)             | 8585 (91.8)                | 24134 (93.9)             | 3872 (94.0)                | 5403 (91.0)              | 771 (92.2)                 |
|                                    | <15          | 5128 (15.5)              | 756 (11.8)                 | 5534 (9.1)               | 767 (8.2)                  | 1562 (6.1)               | 249 (6.0)                  | 533 (9.0)                | 65 (7.8)                   |
| Blood Urea (mmol/L)                | <7           | 13721 (48.4)             | 2633 (47.2)                | 28504 (54.9)             | 4109 (50.9)                | 14805 (66.2)             | 1877 (51.3)                | 3024 (61.3)              | 378 (51.5)                 |
|                                    | 7-14         | 9659 (34.0)              | 2027 (36.3)                | 17073 (32.9)             | 2927 (36.3)                | 5636 (25.2)              | 1291 (35.3)                | 1355 (27.5)              | 258 (35.1)                 |
|                                    | >14          | 4998 (17.6)              | 919 (16.5)                 | 6320 (12.2)              | 1032 (12.8)                | 1927 (8.6)               | 490 (13.4)                 | 557 (11.3)               | 98 (13.4)                  |
| C-Reactive Protein (mg/L)          | <50          | 10342 (35.9)             | 1932 (33.9)                | 18415 (35.5)             | 2658 (32.8)                | 8349 (36.8)              | 1261 (33.9)                | 2552 (52.8)              | 307 (42.1)                 |
|                                    | 50-99        | 6632 (23.0)              | 1400 (24.6)                | 13312 (25.7)             | 2160 (26.7)                | 5556 (24.5)              | 1005 (27.0)                | 892 (18.5)               | 167 (22.9)                 |
|                                    | >=100        | 11824 (41.1)             | 2363 (41.5)                | 20110 (38.8)             | 3277 (40.5)                | 8757 (38.6)              | 1455 (39.1)                | 1385 (28.7)              | 256 (35.1)                 |

**Table S3. Number (%) of patients receiving steroids and tocilizumab by immune status and pandemic wave.**

| label       | levels | Immunocompetent - Wave 1 | Immunocompromised - Wave 1 | Immunocompetent - Wave 2 | Immunocompromised - Wave 2 | Immunocompetent - Wave 3 | Immunocompromised - Wave 3 | Immunocompetent - Wave 4 | Immunocompromised - Wave 4 |
|-------------|--------|--------------------------|----------------------------|--------------------------|----------------------------|--------------------------|----------------------------|--------------------------|----------------------------|
| Steroids    | No     | 20192 (83.3)             | 2405 (48.9)                | 7721 (16.3)              | 824 (10.9)                 | 2223 (11.7)              | 277 (8.5)                  | 1246 (36.3)              | 101 (18.7)                 |
|             | Yes    | 4035 (16.7)              | 2513 (51.1)                | 39747 (83.7)             | 6725 (89.1)                | 16776 (88.3)             | 2981 (91.5)                | 2188 (63.7)              | 439 (81.3)                 |
| Tocilizumab | No     | 12340 (99.5)             | 2482 (99.6)                | 21610 (93.7)             | 3529 (95.5)                | 7812 (80.4)              | 1422 (85.0)                | 1107 (86.7)              | 206 (88.8)                 |
|             | Yes    | 59 (0.5)                 | 11 (0.4)                   | 1456 (6.3)               | 167 (4.5)                  | 1900 (19.6)              | 251 (15.0)                 | 170 (13.3)               | 26 (11.2)                  |

**Table S4. Outcomes by reason for immunocompromise.**

| label                    | levels | Immunocompetent | Pre-Existing Immunological Disorder | Previous Organ Transplant | Cancer      | HIV/AIDS   | Pre-Admission Immunosuppressants | Pre-Admission Steroids |
|--------------------------|--------|-----------------|-------------------------------------|---------------------------|-------------|------------|----------------------------------|------------------------|
| Oxygen                   | No     | 38776 (29.2)    | 151 (29.2)                          | 471 (30.6)                | 1555 (30.7) | 142 (29.0) | 2858 (22.6)                      | 350 (22.7)             |
|                          | Yes    | 94128 (70.8)    | 367 (70.8)                          | 1070 (69.4)               | 3516 (69.3) | 348 (71.0) | 9769 (77.4)                      | 1195 (77.3)            |
| Critical Care Admission  | No     | 112738 (84.5)   | 421 (81.1)                          | 1209 (78.2)               | 4437 (87.3) | 367 (74.1) | 10637 (84.1)                     | 1319 (85.2)            |
|                          | Yes    | 20710 (15.5)    | 98 (18.9)                           | 337 (21.8)                | 648 (12.7)  | 128 (25.9) | 2005 (15.9)                      | 229 (14.8)             |
| Non-Invasive Ventilation | No     | 107620 (81.5)   | 416 (80.5)                          | 1170 (76.2)               | 4127 (81.8) | 369 (75.8) | 9758 (77.7)                      | 1212 (79.5)            |
|                          | Yes    | 24445 (18.5)    | 101 (19.5)                          | 365 (23.8)                | 918 (18.2)  | 118 (24.2) | 2796 (22.3)                      | 313 (20.5)             |
| Invasive Ventilation     | No     | 123531 (93.4)   | 471 (90.9)                          | 1365 (88.9)               | 4820 (95.3) | 428 (87.9) | 11672 (92.9)                     | 1415 (92.4)            |
|                          | Yes    | 8665 (6.6)      | 47 (9.1)                            | 171 (11.1)                | 236 (4.7)   | 59 (12.1)  | 898 (7.1)                        | 116 (7.6)              |
| Death                    | No     | 102207 (78.1)   | 391 (75.9)                          | 1100 (72.8)               | 3168 (63.5) | 396 (81.6) | 8849 (71.4)                      | 1005 (66.0)            |
|                          | Yes    | 28608 (21.9)    | 124 (24.1)                          | 411 (27.2)                | 1818 (36.5) | 89 (18.4)  | 3540 (28.6)                      | 517 (34.0)             |

**Figure S1: Consort diagram**

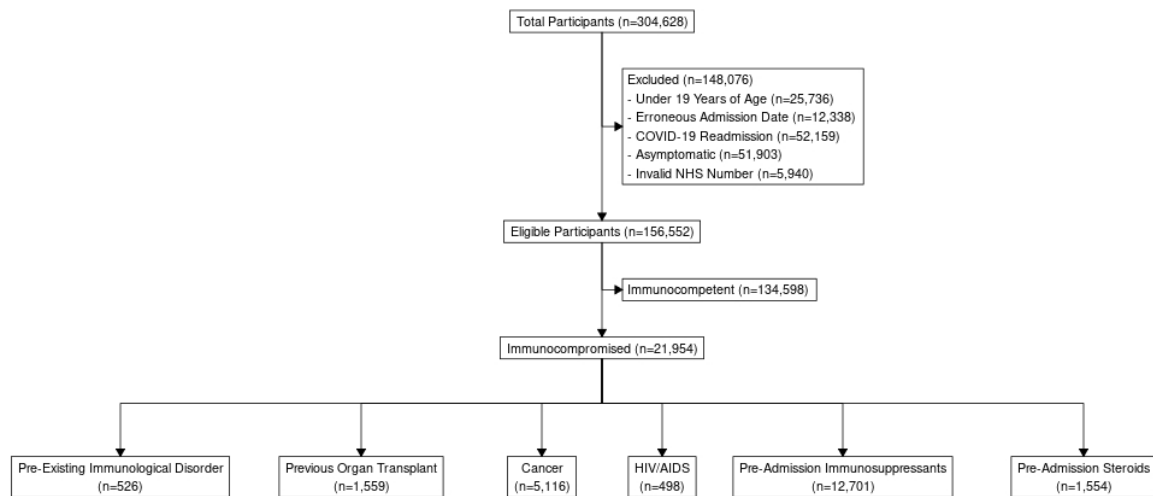

## Figure S2. Admissions stratified by the number of vaccine doses received

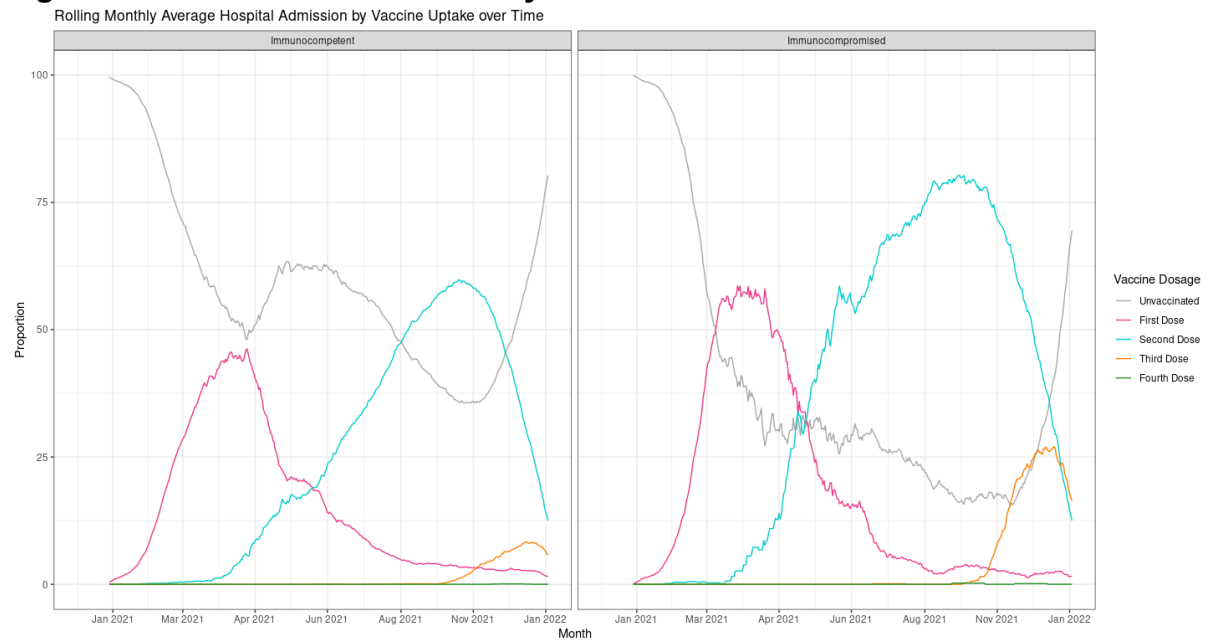

**Figure S3. Steroid usage by immune status in the first 4 pandemic waves in the UK**

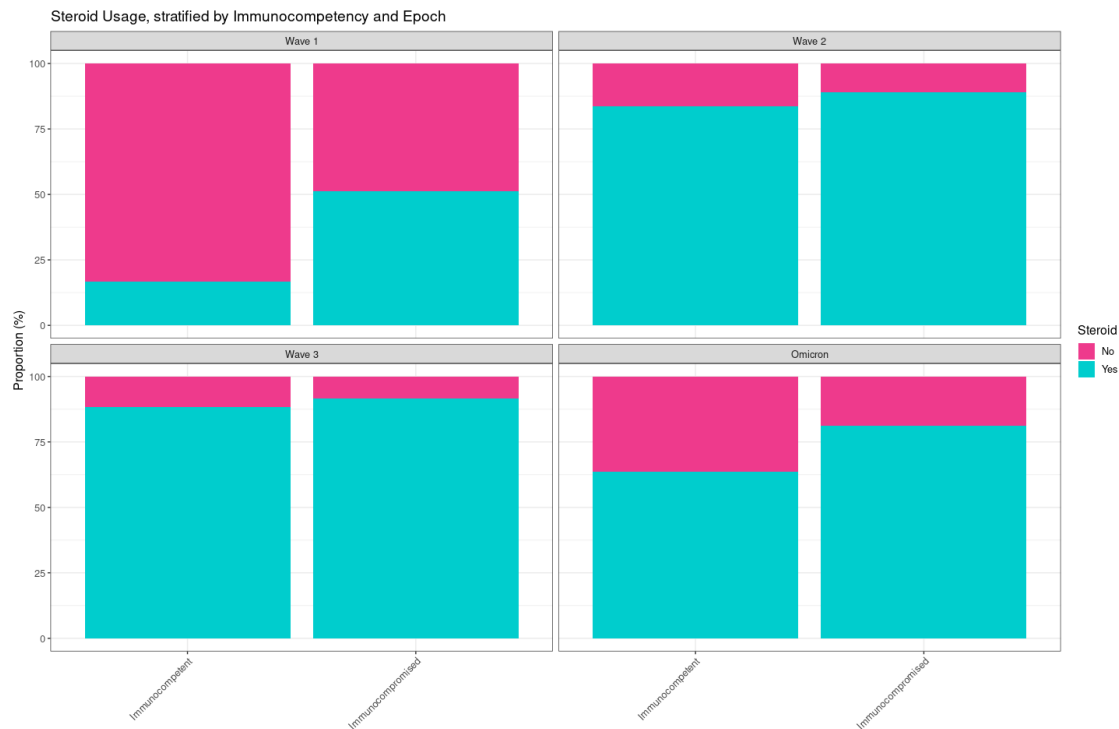

**Figure S4. Tocilizumab usage by immune status in the first 4 pandemic waves in the UK**

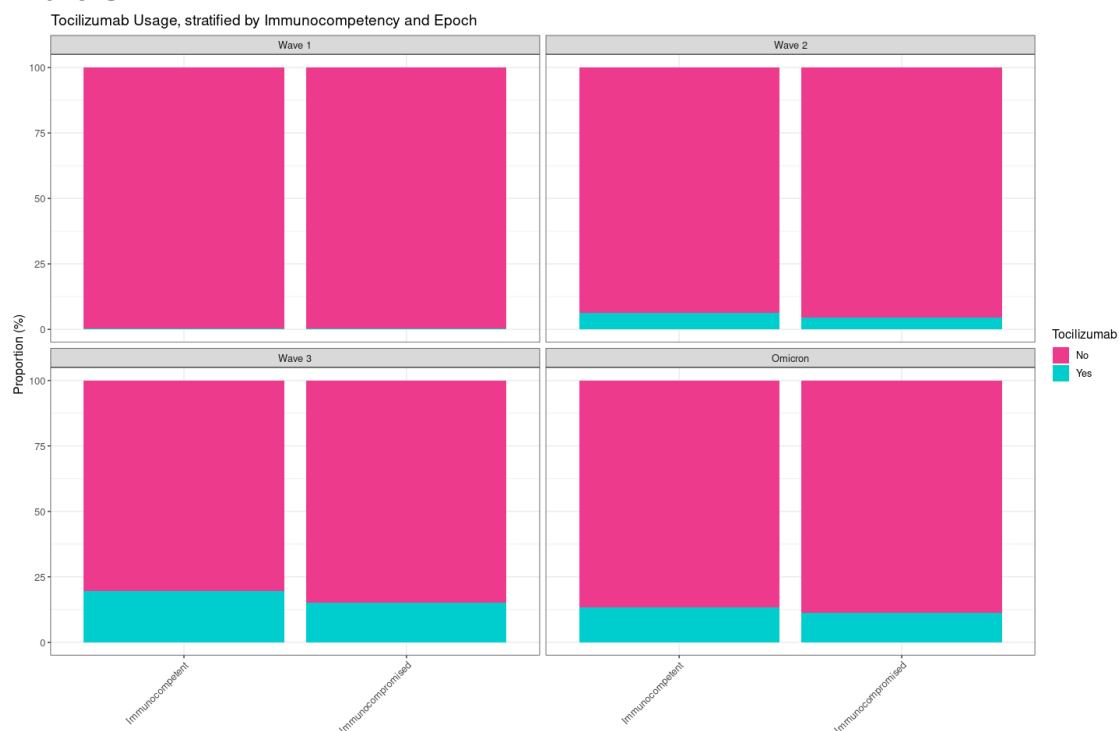

**Figure S5. Outcome of hospitalised immunocompromised patients, compared with immunocompetent patients. Odds ratios (OR) for in-hospital death from univariable logistic regression in each of the first four pandemic waves in the UK.**



Death: OR (95% CI, p-value)

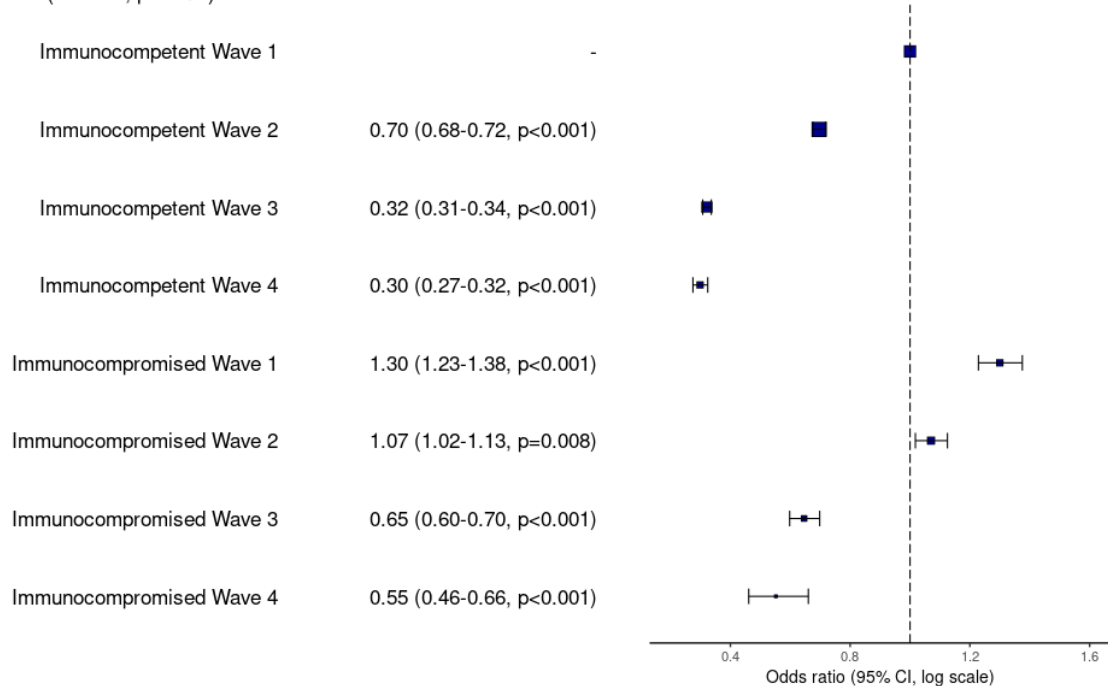

**Figure S6. Number of admissions of immunocompetent and immunocompromised patients over time**

Monthly Hospital Admission Frequency over Time  
76,948 Patients Admitted before 8th December 2020

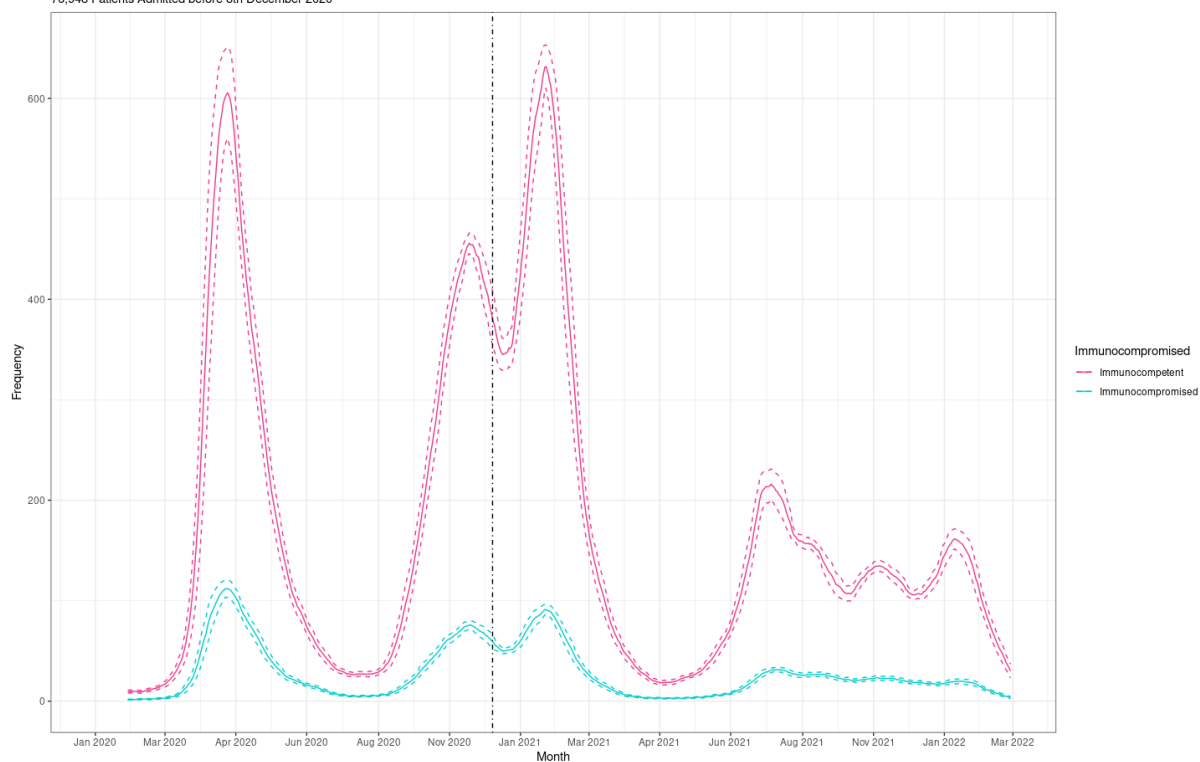

Source: https://medrxiv.org/content/medrxiv/early/2022/08/11/2022.08.08.22278576.full.pdf
